# Supplementary material for: Influence of genome-scale RNA structure disruption on the replication of murine norovirus—similar replication kinetics in cell culture but attenuation of viral fitness in vivo
Source: PubMed Central journal article supplement (PMC3695492; doi:10.1093/nar/gkt334), 2013-04-27
Supplement: supp_gkt334_nar-00712-2013-File011.pdf [file supp_gkt334_nar-00712-2013-File011.pdf]

SUPPLEMENTARY DATA

TABLE S1

PRIMERS USED FOR AMPLIFICATION OF MNV RNA SEQUENCES

| Assay                             | Pos/Orient  | Sequence (5'-3')                         |
|-----------------------------------|-------------|------------------------------------------|
| Region 1 PCR                      | 1081F       | GCATGGCCTTCGGTCTGACATC                   |
|                                   | 1121F       | GCTTGCCTCCACCAACTCGG                     |
|                                   | 2500R       | TGGTGGTAGATAGAGAAGGCTGT                  |
|                                   | 2650R       | CGCCCTCGGCCCTTCTTGTCTTACCCTTCTTGC        |
| Region 2 PCR                      | 2902F       | GCAAGCCAATTGACTGGAATGTGGTTGGCCCC         |
|                                   | 2961F       | GACTACGGTGAGAAGATCAGCTTCG                |
|                                   | 4128R       | CGCGAATCATGGTGCCAAGGTCAGAGCC             |
|                                   | 4155R       | CACAGAAGGGGCCAAAAGCGCGAGC                |
| Region 3 PCR                      | 2342F       | CATGGTTGAGAAAGTCAAGGAGC                  |
|                                   | 2412F       | GCCCGGCTCCGCTGTTATTGC                    |
|                                   | 3099R       | CGGTGCCCTTGGGTGGCGCCACATG                |
|                                   | 3035R       | CCATCCCGTGCCGAAGTGTACGACG                |
| Reverse transcription             | 7350R       | AAAATGCATCTAAATACTACTAAAAGAAAAGAGC       |
| Quantitative PCR                  | 5380R       | GAACCTCCATGTTCCCAACCCAGCCGGTGTACATGG     |
|                                   | 5028S       | CCGCAGGAACGCTCAGCAGT                     |
|                                   | 5177R       | GCAAGAGCCGCGCCAGCCACGGGCTGAATGGGGACGGCCT |
|                                   | 5077R-Probe | CTGCGCCATCACTCAT                         |
|                                   | 18sS        | GTAACCCGTTGAACCCCATTC                    |
|                                   | 18sR        | ACCATCCAATCGGTAGTAGCG                    |
|                                   | 5275F       | ACCCAGGTGAAATACTGTTTG                    |
|                                   | 5452R       | TGGGAAAATAGGGTGGTACAAG                   |
| Allele-specific PCR<br>(Region 1) | 2141F       | TGCTGGCAAGGTTACCGCCTTC                   |
|                                   | 2650R       | CGCCCTCGGCCCTTCTTGTCTTACCCTTCTTGC        |
|                                   | 2206F       | CAGCGATTGGCTACAAGGCATGGGCTGCACCTG        |
|                                   | 2401R_F1    | CGCCTGACGCAGTTCACCAGTG                   |
| Digest PCR (Region 1)             | 1081F       | GCATGGCCTTCGGTCTGACATC                   |
|                                   | 1121F       | GCTTGCCTCCACCAACTCGG                     |
|                                   | 1522R       | GGCCTGCCAGAGACCATAATCAC                  |
|                                   | 2650R       | CGCCCTCGGCCCTTCTTGTCTTACCCTTCTTGC        |
| Allele-specific PCR<br>(Region 2) | 2902F       | GCAAGCCAATTGACTGGAATGTGGTTGGCCCC         |
|                                   | 4155R       | CACAGAAGGGGCCAAAAGCGCGAGC                |

|                       |          |                                  |
|-----------------------|----------|----------------------------------|
|                       | 3678F    | GCTTACCTGGGYTCCAAGGATGAGAG       |
|                       | 3846R_F2 | GGGCTCCAGCGTATTCTCAAGT           |
| Digest PCR (region 2) | 2902F    | GCAAGCCAATTGACTGGAATGTGGTTGGCCCC |
|                       | 3678F    | GCTTACCTGGGYTCCAAGGATGAGAG       |
|                       | 4128R    | CGCGAATCATGGTGCCAAGGTCAGAGCC     |
|                       | 4155R    | CACAGAAGGGGCCAAAAGCGCGAGC        |

FIGURE S1

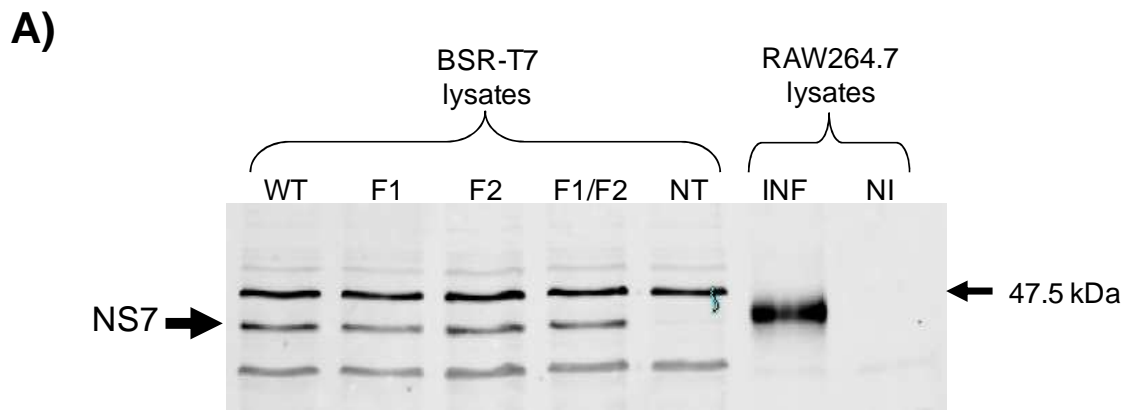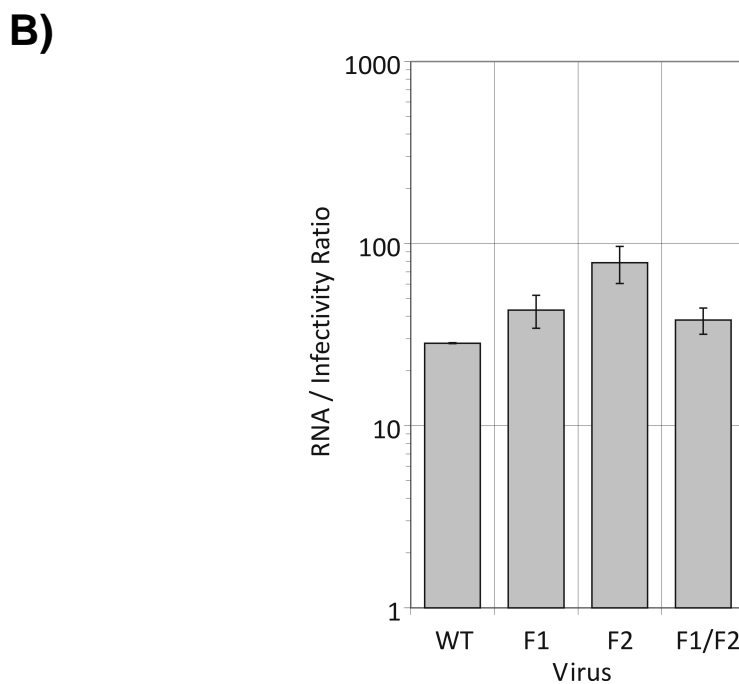

(A) Western blot detection of NS7 (viral RNA polymerase) expressed in BSRT-7 cells after transfection with WT and RNA-structure disrupted mutant cDNA. Infected and non-infected RAW264.7 lysates acted as an assay control. (B) Infectivity to RNA ratios was measured by extracting RNA from equal amounts of viral particles and quantifying viral copy numbers by qPCR.

FIGURE S2

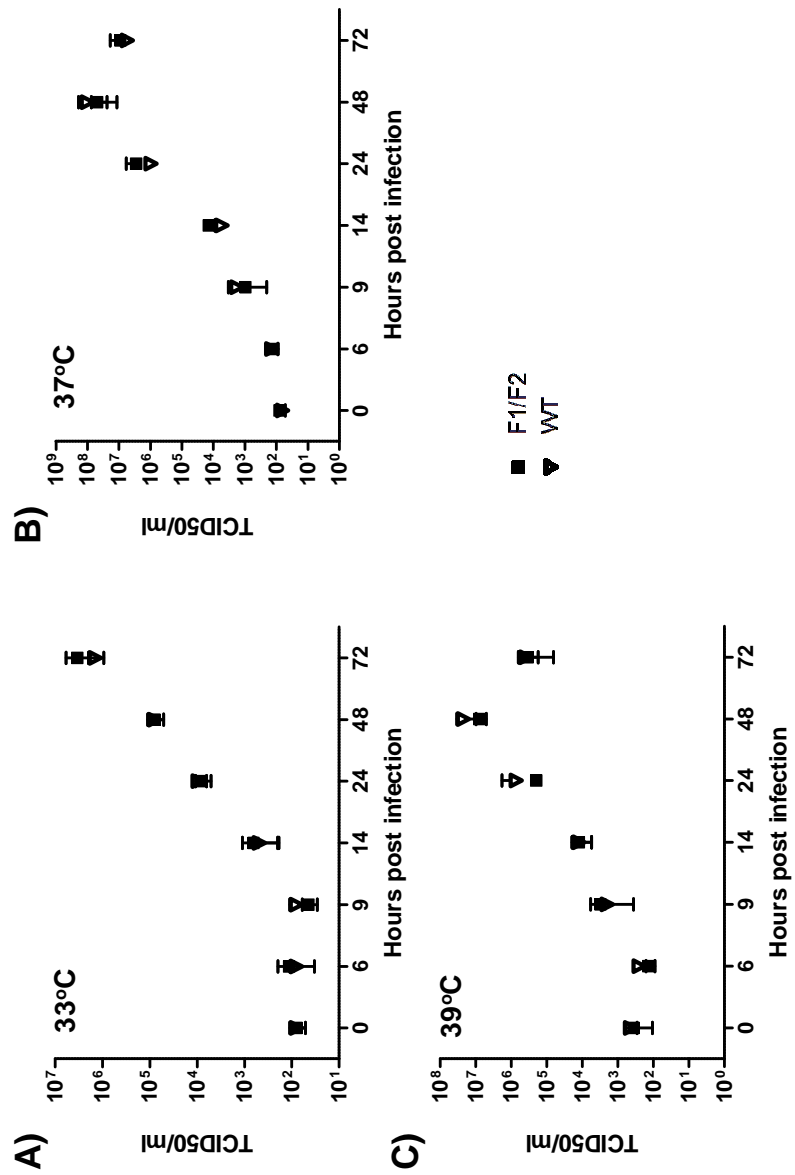

Influence of incubation temperature on the replicaion of WT and F1/F2 viruses.

Multistep growth curves (m.o.i of 0.01) were performed in RAW264.7 cells at (A) 33°C, (B) 37°C and (C) 39°C. Infectivity titres expressed as TCID50s / ml were determined at several time points post-infection..

FIGURE S3A

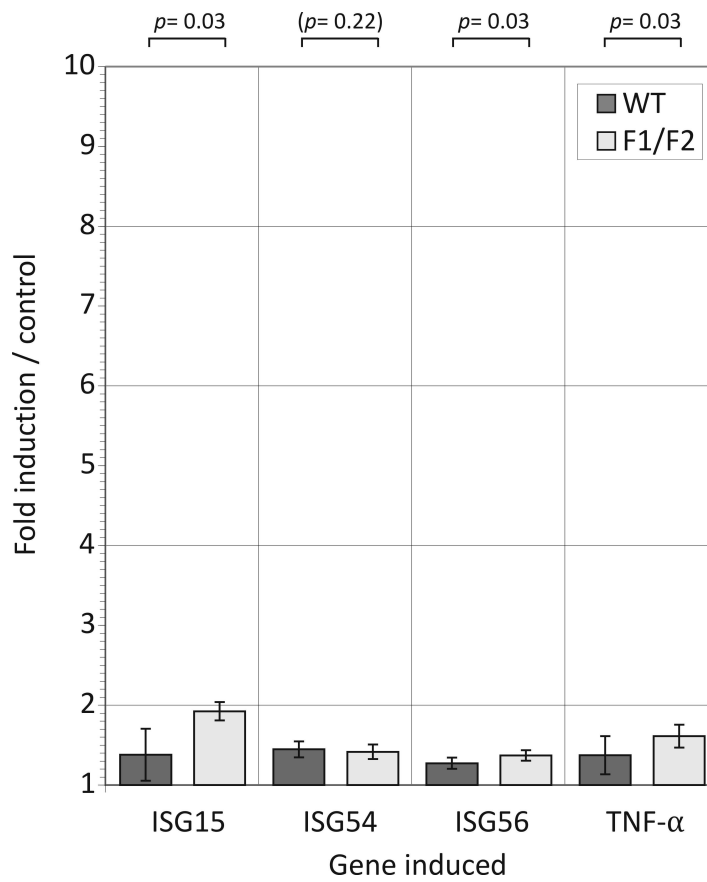

Low level induction of ISGs 15, 54 and 56 and TNF- $\alpha$  in RAW264.7 infected with MNV3 WT or F1/F2 mutants at an m.o.i. of 1 and assaying mRNA levels by qPCR at 8 hours. All assays were performed in triplicate (mean values and SEMs shown by bars and error bars).

FIGURE S3B

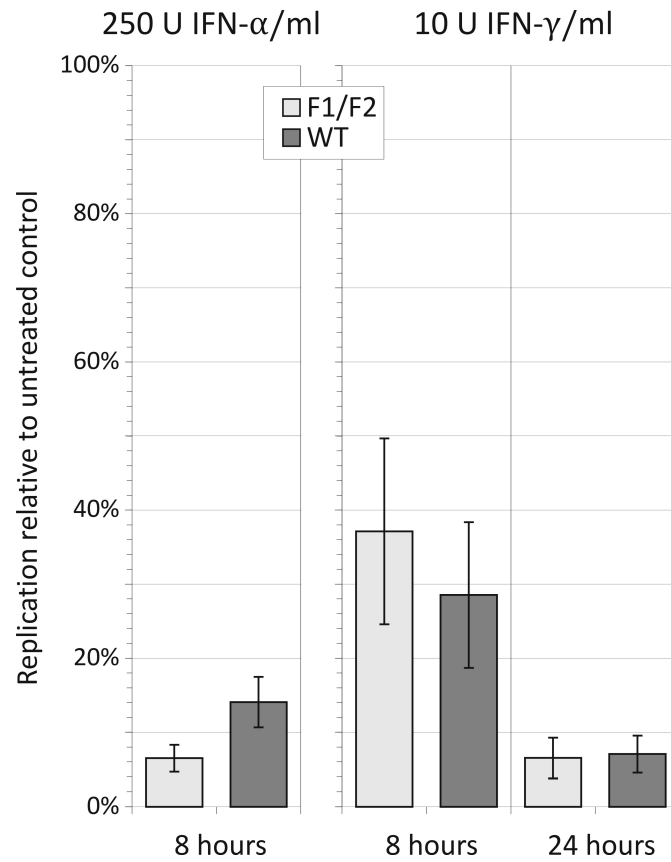

Sensitivity of WT and F1/F2 variants of MNV to IFN- $\alpha$  and IFN- $\gamma$  shown as the proportion of RNA levels in IFN-treated cells compared to the untreated control. No significant differences between replication rates of WT and F1/F2 variants were detected (student T test,  $p > 0.05$  for all comparisons)

FIGURE S4

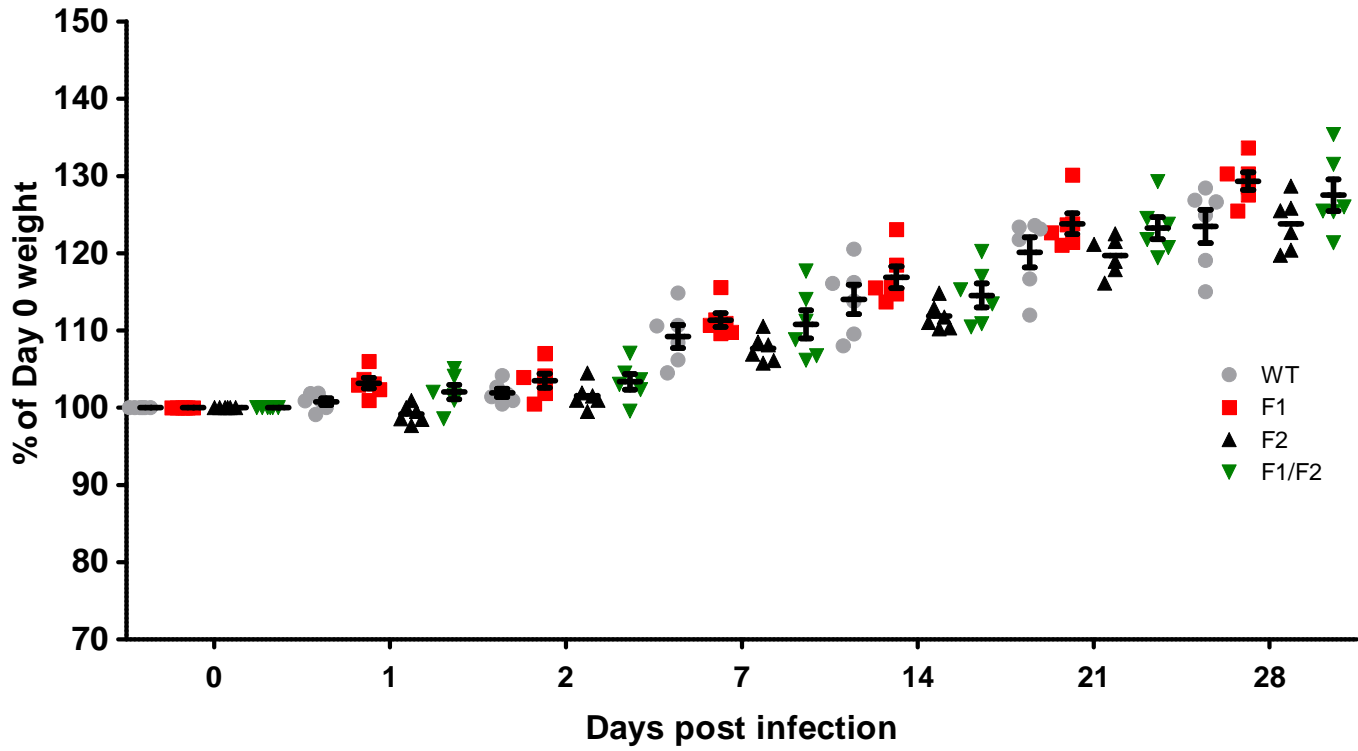

Change in weight of mice infected with F1, F2 and F1/F2 mutant viruses compared to those infected with WT virus. Bars show means and SEMs for weight distributions in each category.

FIGURE S5

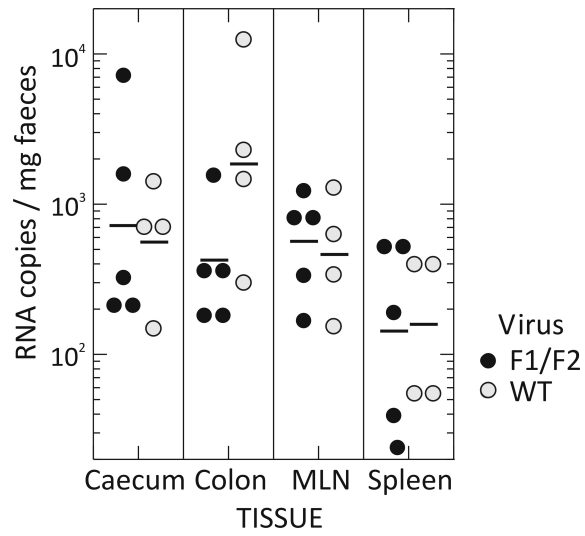

Viral loads in tissues collected 9 months post-infection with WT and F1/F2 mutant viruses. No significant differences in viral loads were detected in mice infected mutant and WT viruses in any tissue.



FIGURE S6

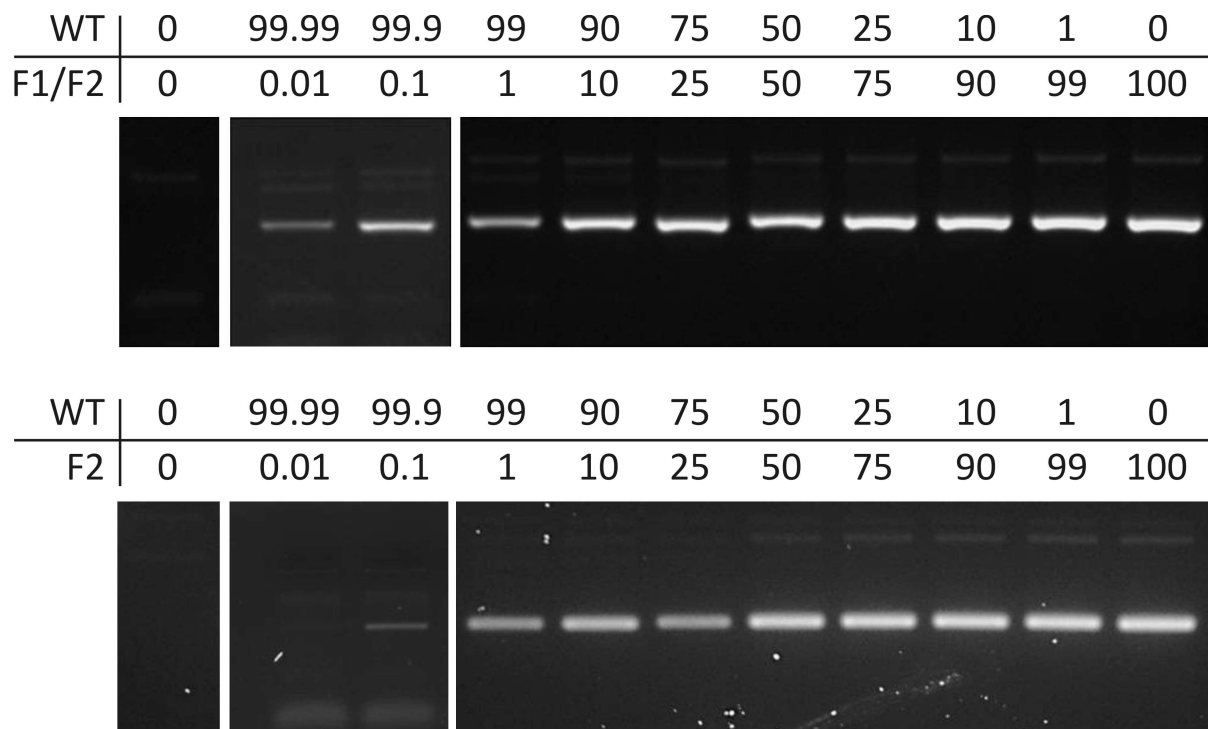

Sensitivity of mutant-specific PCR for different input proportions of WT and F1 or F2 mutant viruses (proportions indicated above gel images).

FIGURE S7

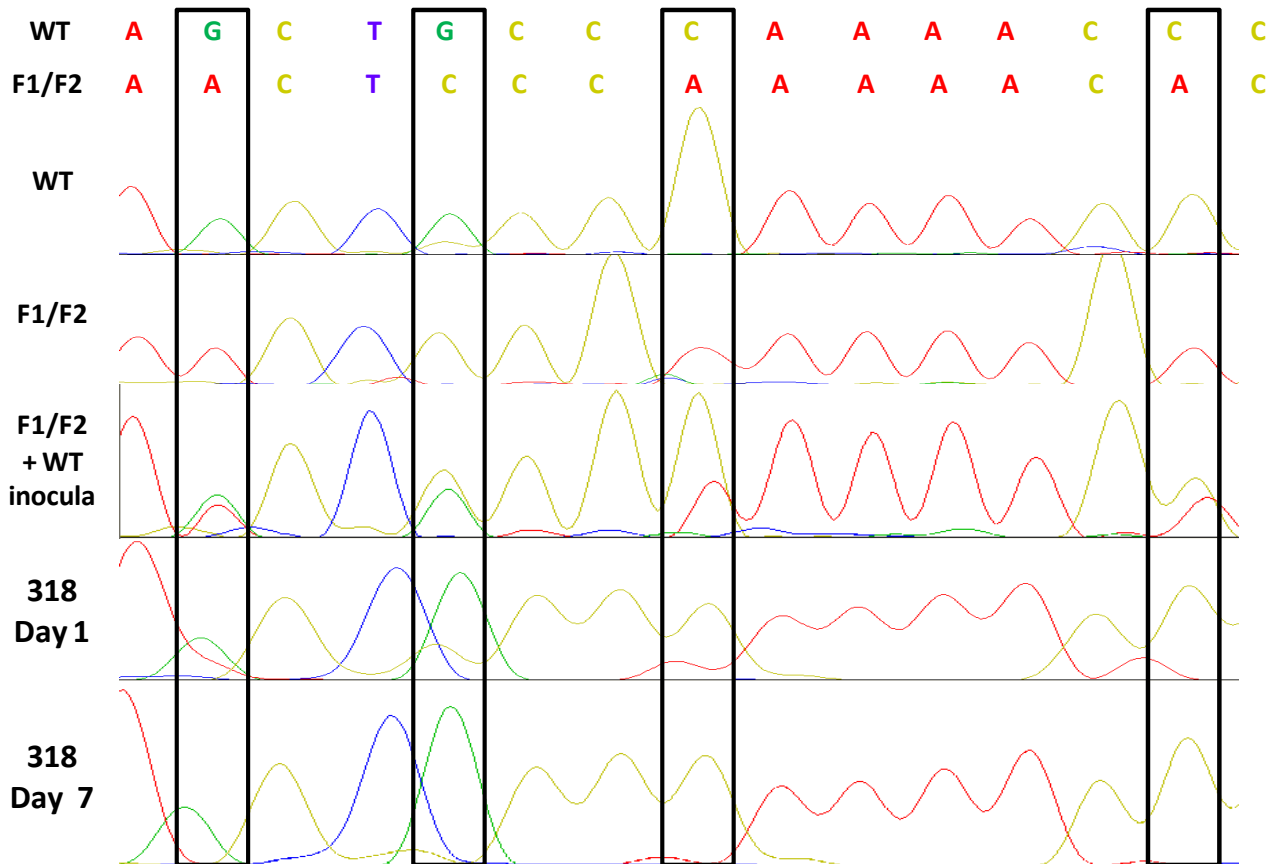

Representative chromatograms of Sanger sequencing reactions of regions of F1 variable in sequence between WT and mutant viruses (genome position 2368-2381; polymorphic sites shown in boxes). This compares sequence traces of WT and F1 sequences with the inoculum strain (50%/50% TCID<sub>50</sub> ratio of WT and F1/F2) and with viral RNA extracted from faecal samples of co-infected mice collected on days 1 and 7 post inoculation.

## SEQUENCE SUPPLEMENT

Sequences of MNV recovered from mice infected with WT and F1/F2 mutants.

### *Region 1*

>F1+2

```
GCCTCCACCAACTCGGCCCTCAAGGCCGCGCAGGAGATGGGGAAGTTTGC
GATTGAGGTTTTTCAAGCAAATCATGGCCTGGATCTGGCCCTCCGAGGACC
CGGTACCCGCCCTGCTCTCAAACATGGAGCAGGCTGTTCATCAAGAACGAG
TGCCAGCTCGAGAACCAACTCACCACCATGTTGAGGGACCGAAATGCAGG
AGCAGAGTTCTTGAAGGCTCTAGATGAAGAAGAGCAGGAGGTTTCGCAAGA
TTGGCGCCAAGTGTGGCAATTCTGCCACCACCGGCACGACTAATGCTCTC
TTGGCTAGGATCAGCATGGCCCCGCGCTGCCTTTGAGAAGGCACGAGCCGA
GCAGACCTCTCGCGTCCGCCAGTTGTGATTATGGTCTCTGGCAGGCCAG
GCATTGGGAAAACTTGTCTTCTGCCAGAACCTAGCAAAAAGGATCGCGGCC
TCGCTGGGCGACGAGACCTCAGTTGGCATCATCCCGCGTGGGACGTTGGA
CCACTGGGACGCTTACAAGGGCGCCAGGGTGGTACTGTGGGACGACTTTG
GGATGGACAATGTAGTCAAGGATGCCCTGCGCCTGCAGATGCTCGCAGAC
ACATGCCCCGCTCACTCTTAATTGTGACAGGATTGAGAACAAGGAAAGAT
GTTTACTCTCAGGTCATCATCACCACCAACCAGCAGACACCCGTCC
CCTTGGATTATGTCAACCTTGAGGCCGTTTGCCGGCGCATCGATTTCCCTG
GTCTATGCTGAGAGCCCCGTGGTCGACGCTGCGCGAGCCAGGTCCCCTGG
TGATGTGGCCGCTGTGAAAGCCGCCATGAGGCCGATTACAGCCACATCA
ACTTCATTTTGGCCCCCAGGGCGGCTTTGACCGCCAGGGCAACACACCC
TATGGCAAGGGGGTACGAAGATCATCGGGGCCACTGCCCTCTGCGCCAG
GGCTGTTGCGCTTGTGCATGAGCGCCATGATGATTTCCGGTCTGCAGAACA
AAGTCTATGATTTTATGCTGGCAAGGTTACCGCATTCAGACCATGGCT
GCTGATGCGGGCATCCCCTGGTATAAGATGGCGGCCATTGGCTACAAGGC
GATGGGCTGCACTTTCGCTGGAGGAAGCCATGAACCTGCTCAAGGACTATG
AGGTAGCCCCCTGCCAGGTCATCTACAACGGTGCCACCTACAACGTCAGC
TGATCAAGGGGGCCCCCATGGTTGAGAAAAGTCAAGGAGCCTGAACTCCC
AAAAACACTGGTGAACCTGCGTCAGGCGGATTAAGGAGGCCCGGCTCCGCT
GTTATTGCAGGATGGCCACAGACGTCATCACCTCCATCCTGCGAGGCGGCT
GGGACAGCCTTCTCTATCTACCACCA
```

>MNV1

```
GCTTCCACCAACTCGGCTCTCAAGGCCGCCAAGAGATGGGCAAGTTTCGC
CATAGAGGCTTTCAAGCAAATTATGGCCTGGATCTGGCCCTCTGAGGACC
CAGTGCCAGCCCTCTTATCCAACATGGAGCAGGCCATCATTAAGAATGAG
TGTCAACTGGAGAACCAACTCACGGCCATGTTGCGGGATCGCAACGCAGG
GGCTGAATTCCTAAGGTCCTTTGATGAGGAGGAGCAGGAAGTCCGCAAGA
TCGAGCTAAGTGCGGCAACTCGGCCACCACTGGAACCACCAACGCTCTG
CTGGCCAGGATCAGCATGGCCCCGCGCGGCTTTGAGAAAAGCTCGCGCTGA
ACAGACCTCCCAGTCCGCCCTGTGGTGCATGATGTTCTCAGGCAGGCCCCG
GGATCGGGAAAACCTGCTTTTGCAAAACCTGGCCAAGAGGATTGCTGCG
TCCCTGGGTGATGAGACCTCTGTTGGCATCATAACCACGCGCTGATGTCGA
CCACTGGGATGCTTACAAGGGAGCCAGAGTGGTTCTCTGGGATGATTTCCG
GCATGGACAACGTTGGTGAAGGATGCACTGAGGCTTCAGATGCTTGCCGAC
ACGTGCCAGTGACACTCAATTGTGACAGGATTGAGAACAAGGAAAGAT
GTTTACTCTCAGGTCATTATCATCACCACAAATCAACAAAACCCCCGTGC
CCCTGGACTATGTCAACCTGGAGGCGGTCTGCCCGCATAGATTTCCCTG
GTTTATGCTGAGAGCCCTGTTGTTGATGATGCTCGGGCCAGAGCCCCCTGG
CGATGTGAATGCAGTGAAGCTGCCATGAGGCCCGATTACAGCCACATCA
ATTTTCATCTTGGCACCGCAGGGCGGCTTTGACCGTCAGGGAAAACACCCCC
TACGGTAAGGGCGTACCAAGATCATTTGGCGCCACTGCTCTTTGCGCGAG
AGCGGTTGCTCTTGTCCATGAGCGCCATGATGATTTCCGGCTCCAGAACA
AGGTCTATGACTTTGATGCCGGCAAGATCACCGCTTCAAGNCCATGGCG
GCTGACGCCGGCATTCCATGGTACAAAATGGCAGCTATTGGGTGCAAAGC
AATGGGGTGCACCTGTGTAGAGGAGGCCATGCATTTACTTAAGGATTATG
AGGTGGCTCCCTGTCAGGTGATCTACAATGGTGCCACCTATAATGTGAGC
```

TGCATCAAGGGTGCCCCAATGGTTGAAAAGGTCAAGGAGCCTGAATTGCC  
CAAAACACTTGTCAACTGTGTGTCAGAAGGATAAAGGAGGCCCGCTCCGCT  
GCTACTGTAGGATGGCTGCTGACGTCAACGTCCATTCTGCAGGCGGCC  
GGCACGGCCTTCTCTATTTACCACCA

>pT7 : MNV\3

GCCTCCACCAACTCGGCCCTCAAGGCCGCCAGGAGATGGGCAAGTTTGC  
GATTGAGGTTTTCAAACAAATCATGGCATGGATCTGGCCCTCTGAGGACC  
CGGTGCCCCGCTCTGCTTTCCAACATGGAGCAGGCTGTCATCAAGAACGAG  
TGCCAGCTTGAGAACCAACTCACGACCATGTTGCGGGACCGCAACGCTGG  
AGCTGAGTTCTTGAAGGCACTCGACGAAGAAGAGCAAGAGGTCCGGAAAA  
TTGCAGCCAAGTGTGGAACACTCTGCCACCACGGGCACAACCAACGCCCTG  
TTGGCCAGGATTAGCATGGCTCGCGCAGCCTTTGAGAAGGCTCGCGCTGA  
GCAGACTTCCCGGGTTGCGCCCCGTAGTGATTATGGTCTCTGGCAGGCCCG  
GGATCGGGAAAACTTGTTTTTTGCAGAACCTAGCAAAAGAGAATTGCTGCC  
TCCCTCGGGGATGAGACCTCAGTCGGCATCATAACCGCGCGCCGACGTGGA  
CCACTGGGATGCCTACAAGGGCGCCAGGGTGGTCTCTGGGATGATTTTG  
GCATGGACAATGTGGTGAAGGATGCACTGCGGCTGCAGATGCTTGCTGAC  
ACATGCCCCGTACGCTCAACTGTGACAGGATTGAGAACAAGGGGAAGAT  
GTTTGGATTCTCAAGTTATCATCATCACCACGAACCAGCAGACCCAGTGC  
CTTTGGATTATGTCAACCTTGAGGCGGTCTGCCGCCGATAGACTTCCTG  
GTCTATGCCGAGAGCCCCGTGGTTCGACGCTGCCCGAGCCAGGTCACCGG  
CGACGTGGCCGCTGTCAAGGCCGCTATGAGGCCAGACTACAGCCATATCA  
ATTTTCATCTTGGCACCGCAGGGTGGCTTTGACCGGCAGGGCAACACCCCC  
TACGGCAAGGGCGTCACTAAGATCATCGGCGCCACCGCGCTCTGTGCAAG  
GGCGGTGCGTCTTGTCCATGAGCGTCATGATGATTTTGGCTCCAGAACA  
AAGTCTATGATTTTGTGCTGGCAAGGTTACCGCTTCAAGACCATGGCG  
GCTGATGCCGGCATCCCCTGGTACAAGATGGCAGCGATTGGCTACAAGGC  
CATGGGTCACCTCGGTGGAGGAAGCCATGAACCTACTCAAGGACTATG  
AGGTGGCCCCGTGCCAGGTGATCTACAACGGAGCCACCTACAATGTCAGC  
TGCATCAAGGGGGCGCCCATGGTTGAGAAAAGTCAAGGAGCCTGAGCTGCC  
CAAAACCTAGTCAATTGTGTGTCAGGAGGATCAAGGAGGCCCGCTCCGCT  
GCTATTGCAGGATGGCCACAGATGTCATCACCTCCATCCTGCAGGCGGCT  
GGGACAGCCTTCTCTATCTACCACCA

>302\_Cae

GCCTCCACCAACTCGGCCCTCAAGGCCGCGCAGGAGATGGGGAAGTTTGC  
GATTGAGGTTTTCAAGCAAATCATGGCCTGGATCTGGCCGTCCGAGGACC  
CGGTACCCGCCCTGCTCTCAAACATGGAGCAGGCTGTCATCAAGAACGAG  
TGCCAGCTCGAGAACCAACTCACCAACATGTTGAGGGACCGAAATGCAGG  
AGCAGAGTTCTTGAAGGCTCTAGATGAAGAAGAGCAGGAGGTTTCGCAAGA  
TTGCGGCCAAGTGTGGCAATTCTGCCACCACCGGCACGACTAATGCTCTC  
TTGGCTAGGATCAGCATGGCCCGGCTGCCTTTGAGAAGGCACGAGCTGA  
GCAGACCTCTCGCGTCCGCCAGTTGTGATTATGGTCTCTGGCAGGCCAG  
GCATTGGGAAAACTTGTCTTCTGCCAGAACCTAGCAAAAAGGATCGCGGCC  
TCCGCTGGGCGACGAGACCTCAGTTGGCATCATCCCGCTGCGGACGTGGA  
CCACTGGGACGCTTACAAGGGCGCCAGGGTGGTACTGTGGGACGACTTTG  
GGATGGACAATGTAGTCAAGGATGCCCTGCGCCTGCAGATGCTCGCAGAC  
ACATGCCCCGTCACTCTCAATTGTGACAGGATTGAGAACAAGGAAAGAT  
GTTTACTCTCAGGTCATCATCATCACCACCAACCAGCAGACACCCGTCC  
CCTTGGATTATGTCAACCTTGAGGCCGTTTGCAGGCGCATTGATTTCCCTG  
GTCTATGCTGAGAGCCCCGTGGTTCGATGCTGCGCGAGCCAGGTCCTTGG  
TGATGTAGCCGCTGTGAAAGCCGCCATGAGGCCGATTACAGCCACATCA  
ACTTCATTTTGGCCCCCAGGGCGGCTTTGACCGCCAGGGCAACACACCC  
TATGGCAAGGGGGTACGAAGATCATCGGGGCCACTGCCCTCTGCGCCAG  
GGCTGTTGCGCTTGTGCATGAGCGCCATGATGATTTTCGGTCTGCAGAACA  
AAGTCTATGATTTTGTGCTGGCAAGGTTACCGCATTCAAGACCATGGCT  
GCTGATGCGGGCATCCCCTGGTATAAGATGGCGGCCATTGGCTACAAGGC  
GATGGGCTGCACTTGCCTGGAAGAAGCCATGAACCTGCTCAAGGACTATG  
AGGTAGCCCCCTGCCAGGTCATCTACAACGGTGGCACCTACAACGTCAGC  
TGCATCAAGGGGGCCCCCATGGTTGAGAAAAGCAAGGAGCCTGAACTCCC  
AAAAACACTGGTGAACCTGCGTCAGGCGGATTAAGGAGGCCCGGCTCCGCT  
GTTATTGCAGGATGGCCACAGACGTCACTCCNNNNNNNNNNNNNNNNNN

NNNNNNNNNNNNNNNNNNNNNNNNNNNNNNNNNN

>302\_Colon

GCCTCCACCAACTCGGCCCTCAAGGCCGCGCAGGAGATGGGGAAGTTTGC  
GATTGAGGTTTTCAAGCAAATCATGGCCTGGATCTGGCCGTCCGAGGACC  
CGGTACCCGCCCTGCTCTCAAACATGGAGCAGGCTGTCATCAAGAACGAG  
TGCCAGCTCGAGAACCAACTCACCGCCATGTTGAGGGACCGAAATGCAGG  
AGCAGAGTTCTTGAAGGCTCTAGATGAAGAAGAGCAGGAGGTTTCGCAAGA  
TTGCGGCCAAGTGTGGCAATTCTGCCACCACCGGCACGACCAATGCTCTC  
TTGGCTAGGATCAGCATGGCCCCGCGCTGCCTTTGAGAAGGCACGAGCCGA  
GCAGACCTCTCGCGTCCGCCCGGTTGTGATTATGGTCTCTGGCAGGCCAG  
GCATTTGGGAAAACCTTGCTTCTGCCAGAACCCTAGCAAAAAGGATCGCGGCC  
TCGCTGGGCGACGAGACCTCAGTTGGCATCATCCCGCGTGGGACGTGGA  
CCACTGGGACGCTTACAAGGGCGCCAGGGTGGTACTGTGGGACGACTTTG  
GGATGGACAATGTAGTCAAGGATGCCCTGCGCCTGCAGATGCTCGCAGAC  
ACATGCCCCGTCACTCTTAATTGTGACAGGATTGAGAACAAAGGAAAAGAT  
GTTTACTCTCAGGTCATCATCACCACCAACCAGCAGACACCCGTCC  
CCTTGGATTATGTCAACCTTGAGGCCGTTTGCCGGCGCATCGATTTCCCTG  
GTCTATGCTGAGAGCCCCGTGGTCGAYGCTGCGCGAGCCAGGTCCCCTGG  
TGATGTGGCCGCTGTGAAAGCCGCCATGAGGCCGATTACAGCCACATCA  
ACTTCATTTTGGCCCCCAGGGCGGCTTTGACCGCCAGGGCAACACACCC  
TATGGCAAGGGGGTACGAAGATCATCGGGGCCACTGCCCTCTGCGCCAG  
GGCTGTTGCGCTTGTGCATGAGCGCCATGATGATTTTCGGTCTGCAGAACA  
AAGTCTATGATTTTGGATGCTGGCAAGGTTACCGCATTCAGACCATGGCT  
GCTGATGCGGGCATCCCCTGGTATAAGATGGCGGCCATTGGCTACAAGGC  
GATGGGCTGCACCTTGTGTGGAGGAAGCCATGAACCTGCTCAAGGACTATG  
AGGTAGCCCCCTGCCAGGTCATCTACAACGGTGCCACCTACAACGTCAGC  
TGCATCAAGGGGGCCCCCATGGTTGAGAAAAGTCAAGGAGCCTGAACTCCC  
AAAAACACTGGTGAACCTGCGTCAGGCGGATTAAGGAGGCCCGGCTCCGCT  
GTTATTGAGGATGGCCACAGACGTCATCACCTCCATCCTGCAGGCGGCT  
GGGACAGCCTTCTCTATCTACCACCA

>302\_MLN

GCCTCCACCAACTCGGCCCTCAAGGCCGCGCAGGAGATGGGGAAGTTTGC  
GATTGAGGTTTTCAAGCAAATCATGGCCTGGATCTGGCCGTCCGAGGACC  
CGGTACCCGCCCTGCTCTCAAACATGGAGCAGGCTGTCATCAAGAACGAG  
TGCCAGCTCGAGAACCAACTCACCACCATGTTGAGGGACCGAAATGCAGG  
AGCAGAGTTCTTGAAGGCTCTAGATGAAGAAGAGCAGGAGGTTTCGCAAGA  
TTGCGGCCAAGTGTGGCAATTCTGCCACCACCGGCACGACTAATGCTCTC  
TTGGCTAGGATCAGCATGGCCCCGCGCTGCCTTTGAGAAGGCACGAGCTGA  
GCAGACCTCTCGCGTCCGCCCGGTTGTGATTATGGTCTCTGGCAGGCCAG  
GCATTTGGGAAAACCTTGCTTCTGCCAGAACCCTAGCAAAAAGGATCGCGGCC  
TCGCTGGGCGACGAGACCTCAGTTGGCATCATCCCGCGTGGGACGTGGA  
CCACTGGGACGCTTACAAGGGCGCCAGGGTGGTACTGTGGGACGACTTTG  
GGATGGACAATGTAGTCAAGGATGCCCTGCGCCTGCAGATGCTCGCAGAC  
ACATGCCCCGTACTCTTAATTGTGACAGGATTGAGAACAAAGGAAAAGAT  
GTTTACTCTCAGGTCATCATCACCACCAACCAGCAGACACCCGTCC  
CCTTGGATTATGTCAACCTTGAGGCCGTTTGCCGGCGCATCGATTTCCCTG  
GTCTATGCTGAGAGCCCCGTGGTCGATGCTGCGCGAGCCAGGTCCCCTGG  
TGATGTGGCCGCTGTGAAAGCCGCCATGAGGCCGATTACAGCCACATCA  
ACTTCATTTTGGCCCCCAGGGCGGCTTTGACCGCCAGGGCAACACACCC  
TATGGCAAGGGGGTACGAAGATCATCGGGGCCACTGCCCTCTGCGCCAG  
GGCTGTTGCGCTTGTGCATGAGCGCCATGATGATTTTCGGTCTGCAGAACA  
AAGTCTATGATTTTGGATGCTGGCAAGGTTACCGCATTCAGACCATGGCT  
GCTGATGCGGGTATCCCCTGGTATAAGATGGCGGCCATTGGCTACAAGGC  
GATGGGCTGCACCTTGCCTGGAAGAAGCCATGAACCTGCTCAAGGACTATG  
AGGTAGCCCCCTGCCAGGTCATCTACAACGGTGCCACCTACAACGTCAGC  
TGCATCAAGGGGGCCCCCATGGTTGAGAAAAGCAAGGAGCCTGAACTCCC  
AAAAACACTGGTGAACCTGCGTCAGGCGGATTAAGGAGGCCCGGCTCCGCT  
GTTATTGAGGATGGCCACAGACGTCATCACCTCCATCCTGCAGGCGGCT  
GGGACAGCCTTCTCTATCTACCACCA

>303\_M8

GCCTCCACCAACTCGGCCCTCAAGGCCGCGCAGGAGATGGGGAAGTTTGC

GATTGAGGTTTTCAAGCAAATCATGGCCTGGATCTGGCCGTCCGAGGACC  
CGGTACCCGCCCTGCTCTCAAACATGGAGCAGGCTGTCATCAAGAACGAG  
TGCCAGCTCGAGAACCAACTCACCGCCATGTTGAGGGACCGAAATGCAGG  
AGCAGAGTTCTTGAAGGCTCTAGATGAAGAAGAGCAGGAGGTTTCGCAAGA  
TTGCGGCCAAGTGTGGCAATTCTGCCACCACCGGCACGACCAATGCTCTC  
TTGGCTAGGATCAGCATGGCCCGCGCTGCCTTTGAGAAGGCACGAGCCGA  
GCAGACCTCTCGCGTCCGCCAGTTGTGATTATGGTCTCTGGCAGGCCAG  
GCATTGGGAAAACCTTGCTTCTGCCAGAACCTAGCAAAAAGGATCGCGGCC  
TCCACTGGGACGCTTACAAGGGCGCCAGGGTGGTATTGTGGGACGACTTTG  
GGATGGACAATGTAGTCAAGGATGCCCTGCGCTGCAGATGCTCGCAGAC  
ACATGCCCCGTCACTNTTAATTGTGACAGGATTGAGAACAAGGAAAGAT  
GTTTGACTCTCAGGTCATCATCACCACCAACCAGCAGACACCCGTCC  
CCTTGATTATGTCAACCTTGAGGCCGTTTGCCGGCGCATCGATTTCCCTG  
GTCTATGCTGAGAGCCCCGTGGTTCGACGCTGCGCGAGCCAGGTCCCCTGG  
TGATGTGGCCGCTGTGAAAGCCGCCATGAGGCCGATTACAGCCACATCA  
ACTTCATTTTGGCCCCCAGGGCGGCTTTGACCGCCAGGGCAACACACCC  
TATGGCAAGGGGTCACGAAGATCATCGGGGCCACTGCCCTCTGCGCCAG  
GGCTGTTGCGCTTGTGCATGAGCGCCATGATGATTTTCGGTCTGCAGAACA  
AAGTCTATGATTTTGTGCTGGCAAGGTTACCGCATTCAAGACCATGGCT  
GCTGATGCGGGCATCCCCTGGTATAAGATGGCGGCCATTGGCTACAAGGC  
GATGGGCTGCACTTGTGTGGAGGAAGCCATGAACCTGCTCAAGGACTATG  
AGGTAGCCCCCTGCCAGGTCATCTACAACGGTGGCCACCTACAACGTCAGC  
TGCATCAGGGGGGGCCCCATGGTTGAGAAAAGTCAAGGAGCCTGAACTCCC  
AAAAACACTGGTGAACCTGCGTCAGGCGGATTAAGGAGGCCCGGCTCCGCT  
GTTATTGCAGGATGGCCACAGACGTCATCACCTCCATCCTGCANNNNNNN  
NNNNNNNNNNNNNNNNNNNNNNNNNNNNNN

>303\_Cae

GCCTCCACCAACTCGGCCCTCAAGGCCGCGCAGGAGATGGGGAAGTTTGC  
GATTGAGGTTTTCAAGCAAATCATGGCCTGGATCTGGCCGTCCGAGGACC  
CGGTACCCGCCCTGCTCTCAAACATGGAGCAGGCTGTCATCAAGAACGAG  
TGCCAGCTCGAGAACCAACTCACCGCCATGTTGAGGGACCGAAATGCAGG  
AGCAGAGTTCTTGAAGGCTCTAGATGAAGAAGAGCAGGAGGTTTCGCAAGA  
TTGCGGCCAAGTGTGGCAATTCTGCCACCACCGGCACGACCAATGCTCTC  
TTGGCTAGGATCAGCATGGCCCGCGCTGCCTTTGAGAAGGCACGAGCCGA  
GCAGACCTCTCGCGTCCGCCAGTTGTGATTATGGTCTCTGGCAGGCCAG  
GCATTGGGAAAACCTTGCTTCTGCCAGAACCTAGCAAAAAGGATCGCGGCC  
TCGCTGGGCGACGAGACCTCAGTTGGCATCATCCCAGTGCAGGACGTGGA  
CCACTGGGACGCTTACAAGGGCGCCAGGGTGGTATTGTGGGACGACTTTG  
GGATGGACAATGTAGTCAAGGATGCCCTGCGCTGCAGATGCTCGCAGAC  
ACATGCCCCGTCACTCTTAATTGTGACAGGATTGAGAACAAGGAAAGAT  
GTTTGACTCTCAGGTCATCATCACCACCAACCAACAGACACCCGTCC  
CCTTGATTATGTCAACCTTGAGGCCGTTTGCCGGCGCATCGATTTCCCTG  
GTCTATGCTGAGAGCCCCGTGGTTCGAYGCTGCGCGAGCCAGGTCCCCTGG  
TGATGTGGCCGCTGTGAAAGCCGCCATGAGGCCGATTACAGCCACATCA  
ACTTCATTTTGGCCCCCAGGGCGGCTTTGACCGCCAGGGCAACACACCC  
TATGGCAAGGGGTCACGAAGATCATCGGGGCCACTGCCCTCTGCGCCAG  
GGCTGTTGCGCTTGTGCATGAGCGCCATGATGATTTTCGGTCTGCAGAACA  
AAGTCTATGATTTTGTGCTGGCAAGGTTACCGCATTCAAGACCATGGCT  
GCTGATGCGGGCATCCCCTGGTATAAGATGGCGGCCATTGGCTACAAGGC  
GATGGGCTGCACTTGTGTGGAGGAAGCCATGAACCTGCTCAAGGACTATG  
AGGTAGCCCCCTGCCAGGTCATCTACAACGGTGGCCACCTACAACGTCAGC  
TGCATCAGGGGGGGCCCCATGGTTGAGAAAAGTCAAGGAGCCTGAACTCCC  
AAAAACACTGGTGAACCTGCGTCAGGCGGATTAAGGAGGCCCGGCTCCGCT  
GTTATTGCAGGATGGCCACAGACGTCATCACCTCCATCCTGCAGGCGGCT  
GGGACAGCCTTCTCTATCNNNNNNNNN

>303\_Colon

NNNNNNNNNNNACTCGGCCCTCAAGGCCGCGCAGGAGATGGGGAAGTTTGC  
GATTGAGGTTTTCAAGCAAATCATGGCCTGGATCTGGCCGTCCGAGGACC  
CGGTACCCGCCCTGCTCTCAAACATGGAGCAGGCTGTCATCAAGAACGAG  
TGCCAGCTCGAGAACCAACTCACCGCCATGTTGAGGGACCGAAATGCAGG

AGCAGAGTTCTTGAAGGCTCTAGATGAAGAAGAGCAGGAGGTTGCAAGA  
TTGCGGCCAAGTGTGGCAATTCTGCCACCACCGGCACGACCAATGCTCTC  
TTGGCTAGGATCAGCATGGCCCCGCTGCCTTTGAGAAGGCACGAGCCGA  
GCAGACCTCTCGCGTCCGCCAGTTGTGATTATGGTCTCTGGCAGGCCAG  
GCATTGGGAAAACCTTGCTTCTGCCAGAACCCTAGCAAAAAGGATCGCGGCC  
TCGCTGGGCGACGAGACCTCAGTTGGCATCATCCCCTGCGGACGTGGA  
CCACTGGGACGCTTACAAGGGCGCCAGGGTGGTATTGTGGGACGACTTTG  
GGATGGACAATGTAGTCAAGGATGCCCTGCGCTGCAGATGCTCGCAGAC  
ACATGCCCCGTCACCTCTAATTGTGACAGGATTGAGAACAAAGGAAAGAT  
GTTTGACTCTCAGGTCATCATCATCACCACCAACCAACAGACACCCGTCC  
CCTTGATTATGTCAACCTTGAGGCCGTTTGCCGGCGCATGATTTCCCTG  
GTCTATGCTGAGAGCCCCGTGGTTCGATGCTGCGCGAGCCAGGTCCCCTGG  
TGATGTGGCCGCTGTGAAAGCCGCCATGAGGCCCGATTACAGCCACATCA  
ACTTCATTTTGGCCCCCAGGGCGGCTTTGACCGCCAGGGCAACACACCC  
TATGGCAAGGGGGTACGAAGATCATCGGGGCCACTGCCCTCTGCGCCAG  
GGCTGTTGCGCTTGTGCATGAGCGCCATGATGATTTCCGGTCTGCAGAACA  
AAGTCTATGATTTTGTGCTGGCAAGGTTACCGCATTCAGACCATGGCT  
GCTGATGCGGGCATCCCCTGGTATAAGATGGCGGCCATTGGCTACAAGGC  
GATGGGCTGCACCTTGTGTGGAGGAAGCCATGAACCTGCTCAAGGACTATG  
AGGTAGCCCCCTGCCAGGTCATCTACAACGGTGCACCTACAACGTCAGC  
TGCATCAGGGGGGGCCCCATGGTTGAGAAAAGTCAAGGAGCCTGAACTCCC  
AAAAACACTGGTGAACCTGCGTCAGGCGGATTAAGGAGGCCCGGCTCCGCT  
GTTATTGCAGGATGGCCACAGACGTCATCACCTCCATCCTGCAGGCGGCT  
GGGACAGCCTTCTCTATCTACCACCA

>304\_M8

GCCTCCACCAACTCGGCCCTCAAGGCCGCGCAGGAGATGGGGAAGTTTGC  
GATTGAGGTTTTCAAGCAAATCATGGCCTGGATCTGGCCGTCCGAGGACC  
CGGTACCCGCCCTGCTCTCAAACATGGAGCAGGCTGTCTCAAGAACGAG  
TGCCAGCTCGAGAACCAACTCACCACCATGTTGAGGGACCGAAAATGCAGG  
AGCAGAGTTCTTGAAGGCTCTAGATGAAGAAGAGCAGGAGGTTGCAAGA  
TTGCGGCCAAGTGTGGCAATTCTGCCACCACCGGCACGACTAATGCTCTC  
TTGGCTAGGATCAGCATGGCCCCGCTGCCTTTGAGAAGGCACGAGCCGA  
GCAGACCTCCCCTGCGTCCGCCAGTTGTGATTATGGTCTCTGGCAGGCCAG  
GCATTGGGAAAACCTTGCTTCTGCCAGAACCCTAGCAAAAAGGATCGCGGCC  
TCGCTGGGCGACGAGACCTCAGTTGGCATCATCCCCTGCGGACGTGGA  
CCACTGGGACGCTTACAAGGGCGCCAGGGTGGTACTGTGGGACGACTTTG  
GGATGGACAATGTAGTCAAGGATGCCCTGCGCTGCAGATGCTCGCAGAC  
ACATGCCCCGTCACCTCTCAATTGTGACAGGATTGAGAACAAAGGAAAGAT  
GTTTGACTCTCAGGTCATCATCATCACCACCAACCAGCAGACACCCGTCC  
CCTTGATTATGTCAACCTTGAGGCCGTTTGCCGGCGCATGATTTCCCTG  
GTCTATGCTGAGAGCCCCGTGGTTCGATGCTGCGCGAGCCAGGTCCCCTGG  
TGATATAGCCGCTGTGAAAGCCGCCATGAGGCCCGATTACAGCCACATCA  
ACTTCATTTTGGCCCCCAGGGCGGCTTTGACCGCCAGGGCAACACACCC  
TATGGTAAGGGGGTACGAAGATCATCGGGGCCACTGCCCTCTGCGCCAG  
GGCTGTTGCGCTTGTGCATGAGCGCCATGATGATTTCCGGTCTGCAGAACA  
AAGTCTATGATTTTGTGCTGGCAAGGTTACCGCATTCAGACCATGGCT  
GCTGATGCGGGCATCCCCTGGTATAAGATGGCGGCCATTGGCTACAAGGC  
GATGGGCTGCACCTTGCCTGGAGGAAGCCATGAACCTGCTCAAGGACTATG  
AGGTAGCCCCCTGCCAGGTCATCTACAACGGTGCACCTACAACGTCAGC  
TGCATCAAGGGGGCCCCATGGTTGAGAAAAGTCAAGGAGCCTGAACTCCC  
AAAAACACTGGTGAACCTGCGTCAGGCGGATTAAGGAGGCCCGGCTCCGCT  
GTTATTGCAGGATGGCCACAGACGTCATCACCTCCATCCTGCAGGCGGCT  
GGGACAGCCTTCTCTATCTACCACCA

>304\_Cae

GCCTCCACCAACTCGGCCCTCAAGGCCGCGCAGGAGATGGGGAAGTTTGC  
GATTGAGGTTTTCAAGCAAATCATGGCCTGGATCTGGCCGTCCGAGGACC  
CGGTACCCGCCCTGCTCTCAAACATGGAGCAGGCTGTCTCAAGAACGAG  
TGCCAGCTCGAGAACCAACTCACCACCATGTTGAGGGACCGAAAATGCAGG  
AGCAGAGTTCTTGAAGGCTCTAGATGAAGAAGAGCAGGAGGTTGCAAGA  
TTGCGGCCAAGTGTGGCAATTCTGCCACCACCGGCACGACTAATGCTCTC  
TTGGCTAGGATCAGCATGGCCCCGCTGCCTTTGAGAAGGCACGAGCCGA

GCAGACTTCCCGCGTCCGCCAGTTGTGATTATGGTCTCTGGCAGGCCAG  
GCATTGGGAAAACCTTGCTTCTGCCAGAACCTAGCAAAAAGGATCGCGGCC  
TCGCTGGGGCAGCAGACCTCAGTTGGCATCATCCCGCGTGCAGGACGTGGA  
CCACTGGGACGCTTACAAGGGCGCCAGGGTGGTACTGTGGGACGACTTTG  
GGATGGACAATGTAGTCAAGGATGCCCTGCGCTGCAGATGCTCGCAGAC  
ACATGCCCCGTCACTCTCAATTGTGACAGGATTGAGAACAAAAGGAAAAGAT  
GTTTGGACTCTCAGGTCAATCATCACCACCAACCAGCAGACACCCGTCC  
CCTTGGATTATGTCAACCTTGAGGCCGTTTGCCGGCGCATTGATTTCCCTG  
GTTTATGCTGAGAGCCCCGTGGTCGATGCTGCGCGAGCCAGGTCCCCTGG  
TGATACAGCCGCTGTGAAAAGCCGCCATGAGGCCCGATTACAGCCACATCA  
ACTTCAATTTTGGCCCCCAGGGCGGCTTTGACCGCCAGGGCAACACACCC  
TATGGCAAGGGGGTACGAAGATCATCGGGGCCACTGCCCTCTGCGCCAG  
GGCTGTTGCGCTTGTGCATGAGCGCCATGATGATTTCCGCTCGCAGAACA  
AAGTCTATGATTTTGTGCTGGCAAGGTTACCGCATTCAAGACCATGGCT  
GCTGATGCGGGCATCCCCTGGTATAAGATGGCGGCCATTGGCTACAAGGC  
GATGGGCTGCACCTTGCCTGGAGGAAGCCATGAACCTGCTCAAGGACTATG  
AGGTAGCCCCCTGCCAGGTCACTACAACGGTGCCACCTACAACGTCAGC  
TGCATCAAGGGGGCCCCCATGGTTGAGAAAAGTCAAGGAGCCTGAACTCCC  
AAAAACACTGGTGAACCTGCGTCAGGCGGATTAAGGAGGCCCGGCTCCGCT  
GTTATTGCAGGATGGCCACAGACGTCACTACCTCCATCCTGCAGGCGGT  
GGGACAGCCTTCTCTATCTACCACCA

>304\_MLN

GCCTCCACCAACTCGGCCCTCAAGGCCGCGCAGGAGATGGGGAAAGTTTGC  
GATTGAGGTTTTTCAAGCAAATCATGGCCTGGATCTGGCCGTCCGAGGATC  
CGGTACCCGCCCTGCTCTCAAACATGGAGCAGGCTGTCAAGAACGAG  
TGCCAGCTCGAGAACCAACTCACCACCATGTTGAGGGACCGAAATGCAGG  
AGCAGAGTTCTTGAAGGCTCTAGATGAAGAAGAGCAGGAGGTTTCGCAAGA  
TTGCGGCAAGTGTGGCAATTTCTGCCACCACCGGCACGACTAATGCTCTC  
TTGGCTAGGATCAGCATGGCCCCGCGCTGCCCTTTGAGAAGGCACGAGCCGA  
GCAGACCTCCCGCGTCCGCCAGTTGTGATTATGGTCTCTGGCAGGCCAG  
GCATTGGGAAAACCTTGCTTCTGCCAGAACCTAGCAAAAAGGATCGCGGCC  
TCGCTGGGGCAGCAGACCTCAGTTGGCATCATCCCGCGTGCAGGACGTGGA  
CCACTGGGACGCTTACAAGGGCGCCAGGGTGGTACTGTGGGACGACTTTG  
GGATGGACAATGTAGTCAAGGATGCCCTGCGCTGCAGATGCTCGCAGAC  
ACATGCCCCGTCACTCTCAATTGTGACAGGATTGAGAACAAAAGGAAAAGAT  
GTTTGGACTCTCAGGTCAATCATCACCACCAACCAGCAGACACCCGTCC  
CCTTGGATTATGTCAACCTTGAGGCCGTTTGCCGGCGCATTGATTTCCCTG  
GTCTATGCTGAGAGCCCCGTGGTCGATGCTGCGCGAGCCATGTCCCCTGG  
TGATGTAGCCGCTGTGAAAAGCTGCCATGAGGCCCGATTACAGCCACATCA  
ACTTCATTTTGGCCCCCAGGGCGGCTTTGACCGCCAGGGCAACACACCC  
TATGGCAAGGGGGTACGAAGATCATCGGGGCCACTGCCCTCTGCGCCAG  
GGCTGTTGCGCTTGTGCATGAGCGCCATGATGATTTCCGCTCGCAGAACA  
AAGTCTATGATTTTGTGCTGGCAAGGTTACCGCATTCAAGACCATGGCT  
GCTGATGCGGGCATCCCCTGGTATAAGATGGCGGCCATTGGCTACAAGGC  
GATGGGCTGCACCTTGCCTGGAGGAAGCCATGAACCTGCTCAAGGACTATG  
AGGTAGCCCCCTGCCAGGTCACTACAACGGTGCCACCTACAACGTCAGC  
TGCATCAAGGGGGCCCCCATGGTTGAGAAAAGTCAAGGAGCCTGAACTCCC  
AAAAACACTGGTGAACCTGCGTCAGGCGGATTAAGGAGGCCCGGCTCCGCT  
GTTATTGCAGGATGGCCACAGACGTCACTACCTCCATCCTGCAGGCGGT  
GGGACAGCCTTCTCTATCTACCACCA

>305\_Cae

NNNNNNNNAACTCGGCCCTCAAGGCCGCGCAGGAGATGGGGAAAGTTTGC  
GATTGAGGTTTTTCAAGCAAATCATGGCCTGGATCTGGCCGTCCGAGGATC  
CGGTACCCGCCCTGCTCTCAAACATGGAGCAGGCTGTCAAGAACGAG  
TGCCAGCTCGAGAACCAACTCACCACCATGTTGAGGGACCGAAATGCAGG  
AGCAGAGTTCTTGAAGGCTCTAGATGAAGAAGAGCAGGAGGTTTCGCAAGA  
TTGCGGCAAGTGTGGCAATTTCTGCCACCACCGGCACGACTAATGCTCTC  
TTGGCTAGGATCAGCATGGCCCCGCGCTGCCCTTTGAGAAGGCACGAGCCGA  
GCAGACCTCCCGCGTCCGCCAGTTGTGATTATGGTCTCTGGCAGGCCAG  
GCATTGGGAAAACCTTGCTTCTGCCAGAACCTAGCAAAAAGGATCGCGGCC  
TCGCTGGGGCAGCAGACCTCAGTTGGCATCATCCCGCGTGCAGGACGTGGA



CCACTGGGACGCTTACAAGGGCGCCAGGGTGGTACTGTGGGACGACTTTG  
GGATGGACAATGTAGTCAAGGATGCCCTGCGCTGCAGATGCTCGCAGAC  
ACATGCCCCGTCACTCTCAATTGTGACAGGATTGAGAACAAAGGAAAGAT  
GTTTGACTCTCAGGTCATCATCACCACCAACCAGCAGACACCCGTCC  
CCTTGGATTATGTCAACCTTGAGGCCGTTTGCCGGCGCATTGATTTCCCTG  
GTCTATGCTGAGAGCCCCGTGGTTCGATGCTGCGCGAGCCAGGTCCCCCTGG  
TGATGTAGCCGCTGTGAAAGCTGCCATGAGGCCGATTACAGCCACATCA  
ACTTCATTTTGGCCCCCAGGGCGGCTTTGACCGCCAGGGCAACACACCC  
TATGGCAAGGGGGTACGAAGATCATCGGGGCCACTGCCCTCTGCGCCAG  
GGCTGTTGCGCTTGTGCATGAGCGCCATGATGATTTTCGGTCTGCAGAACA  
AAGTCTATGATTTTGTAGTGTGGCAAGGTTACCGCATTCAAGACCATGGCT  
GCTGATGCGGGCATCCCCTGGTATAAGATGGCGGCCATTGGCTACAAGGC  
GATGGGCTGCACTTGCCTGGAGGAAGCCATGAACCTGCTCAAGGACTATG  
AGGTAGCCCCCTGCCAGGTCATCTACAACGGTGCCACCTACAACGTCAGC  
TGCATCAAGGGGGCCCCATGGTTGAGAAAAGTCAAGGAGCCTGAACTCCC  
AAAAACACTGGTGAACCTGCGTCAGGCGGATTAAGGAGGCCCGGCTCCGCT  
GTTATTGCAGGATGGCCACAGACGTCATCACCTCCATCCTGCAGGCGGCT  
GGGACAGCCTTCTCTATCTACCACCA

>306\_M5

GCCTCCACCAACTCGGCCCTCAAGGCCGCGCAGGAGATGGGGAAGTTTGC  
GATTGAGGTTTTCAAGCAAATCATGGCCTGGATCTGGCCGTCCGAGGACC  
CGGTACCCGCCCTGCTCTCAAACATGGAGCAGGCTGTCATCAAGAACGAG  
TGCCAGCTCGAGAACCAACTCACCACCATGTTGAGGGACCGAAATGCAGG  
AGCAGAGTTCTTGAAGGCTCTAGATGAAGAAGAGCAGGAGGTTTCGCAAGA  
TTGCGGCCAAGTGTGGCAATTCTGCCACCACCGGCACGACTAATGCTCTC  
TTGGCTAGGATCAGCATGGCCCCGCGCTGCCTTTGAGAAGGCACGAGCCGA  
GCAGACCTCTCGCGTCCGCCAGTTGTGATTATGGTCTCTGGCAGGCCAG  
GCATTTGGGAAAACCTTGTCTTCTGCCAGAACCTAGCAAAAAGGATCGCGGCC  
TCGCTGGGGCAGCAGACCTCAGTTGGCATCATCCCCTGCGGACGTTGGA  
CCACTGGGACGCTTACAAGGGCGCCAGGGTGGTACTGTGGGACGACTTTG  
GGATGGACAATGTAGTCAAGGATGCCCTGCGCTGCAGATGCTCGCAGAC  
ACATGCCCCGTCACTCTTAATTGTGACAGGATTGAGAACAAAGGAAAGAT  
GTTTGACTCTCAGGTCATCATCACCACCAACCAGCAGACACCCGTCC  
CCTTGGATTATGTCAACCTTGAGGCCGTTTGCCGGCGCATCGATTTCCCTG  
GTCTATGCTGAGAGCCCCGTGGTTCGACGCTGCGCGAGCCAGGTCCCCCTGG  
TGATGTGGCCGCTGTGAAAGCCGCCATGAGGCCGATTACAGTCACATCA  
ACTTCATTTTGGCCCCCAGGGCGGCTTTGACCGCCAGGGCAACACACCC  
TATGGCAAGGGGGTACGAAGATCATCGGGGCCACTGCCCTCTGCGCCAG  
GGCTGTTGCGCTTGTGCATGAGCGCCATGATGATTTTCGGTCTGCAGAACA  
AAGTCTATGATTTTGTGCTGGCAAGGTTACCGCATTCAAGACCATGGCT  
GCTGATGCGGGCATCCCCTGGTATAAGATGGCGGCCATTGGCTACAAGGC  
GATGGGCTGCACTTGCCTGGAGGAAGCCATGAACCTGCTCAAGGACTATG  
AGGTAGCCCCCTGCCAGGTCATCTACAACGGTGCCACCTACAACGTCAGC  
TGCATCAAGGGGGCCCCATGGTTGAGAAAAGTCAAGGAGCCTGAACTCCC  
AAAAACACTGGTGAACCTGCGTCAGGCGGATTAAGGAGGCCCGGCTCCGCT  
GTTATTGCAGGATGGCCACAGACGTCATCACCTCCATCCTGCAGGCGGCT  
GGGACAGCCTTCTCTATCTACCACCA

>306\_M8

NNNNNNNNNNNNNNGGCCCTCAAGGCCGCGCAGGAGATGGGGAAGTTTGC  
GATTGAGGTTTTCAAGCAAATCATGGCCTGGATCTGGCCGTCCGAGGACC  
CGGTACCCGCCCTGCTCTCAAACATGGAGCAGGCTGTCATCAAGAACGAG  
TGCCAGCTCGAGAACCAACTCACCACCATGTTGAGGGACCGAAATGCAGG  
AGCAGAGTTCTTGAAGGCTCTAGATGAAGAAGAGCAGGAGGTTTCGCAAGA  
TTGCGGCCAAGTGTGGCAATTCTGCCACCATCGGCACGACTAATGCTCTC  
TTGGCTAGGATCAGCATGGCCCCGCGCTGCCTTTGAGAAGGCACGAGCCGA  
GCAGACCTCCCCTGCGTCCGCCAGTTGTGATTATGGTCTCTGGCAGGCCAG  
GCATTTGGGAAAACCTTGTCTTCTGCCAGAACCTAGCAAAAAGGATCGCGGCC  
TCGCTGGGGCAGCAGACCTCAGTTGGCATCATCCCCTGCGGACGTTGGA  
CCACTGGGACGCTTACAAGGGCGCCAGGGTGGTACTGTGGGACGACTTTG  
GGATGGACAATGTAGTCAAGGATGCCCTGCGCTGCAGATGCTCGCAGAC  
ACATGCCCCGTCACTCTCAATTGTGACAGGATTGAGAACAAAGGAAAGAT

GTTTACTCTCAGGTCATCATCATCACCACCAACCAGCAGACACCCGTCC  
CCTTGGATTATGTCAACCTTGAGGCCGTTTGCCGGCGCATTGATTTCCCTG  
GTTTATGCTGAGAGCCCCGTGGTTCGATGCTGCGCGAGCCAGGTCCCCTGG  
TGATACAGCCGCTGTGAAAGCCGCCATGAGGCCCGATTACAGCCACATCA  
ACTTCATTTTGGCCCCCAGGGCGGCTTTGACCGCCAGGGCAACACACCC  
TATGGCAAGGGGGTACGAAGATCATCGGGGCCACTGCCCTCTGCGCCAG  
GGCTGTTGCGCTTGTGCATGAGCGCCATGATGATTTTCGGTCTGCAGAACA  
AAGTCTATGATTTTGTGCTGGCAAGGTTACCGCATTCAGACCATGGCT  
GCTGATGCGGGCATCCCCTGGTATAAGATGGCGGCCATTGGCTACAAGGC  
GATGGGCTGCACCTTGCCTGGAGGAAGCCATGAACCTGCTCAAGGACTATG  
AGGTAGCCCCCTGCCAGGTCATCTACAACGGTGCCACCTACAACGTCAGC  
TGCATCAAGGGGGCCCCCATGGTTGAGAAAAGTCAAGGAGCCTGAACTCCC  
AAAAACACTGGTGAAGTGCNNNNNNNNNNNNNNNNNNNNNNNNNNNNNNNN  
NNNNNNNNNNNNNNNNNNNNNNNNNNNNNNNNNNNNNNNNNNNNNNNNNN  
NNNNNNNNNNNNNNNNNNNNNNNNNNNNNNNNNNNNNNNNNNNNNNNNNN

>306\_Cae

GCCTCCACCAACTCGGCCCTCAAGGCCGCGCAGGAGATGGGGAAGTTTGC  
GATTGAGGTTTTCAAGCAAATCATGGCCTGGATCTGGCCGTCCGAGGAYC  
CGGTACCCGCCCTGCTCTCAAACATGGAGCAGGCTGTCAAGAACGAG  
TGCCAGCTCGAGAACCAACTCACCACCATGTTGAGGGACCGAAATGCAGG  
AGCAGAGTTCTTGAAGGCTCTAGATGAAGAAGAGCAGGAGGTTTCGCAAGA  
TTGCGGCCAAGTGTGGCAATTCTGCCACCACCGGCACGACTAATGCTCTC  
TTGGCTAGGATCAGCATGGCCCGCGCTGCCTTTGAGAAGGCACGAGCCGA  
GCAGACCTCCCGCGTCCGCCAGTTGTGATTATGGTCTCTGGCAGGCCAG  
GCATTGGGAAAACCTTGTCTTCTGCCAGAACCTAGCAAAAAGGATCGCGGCC  
TCGCTGGGGCAGCAGACCTCAGTTGGCATCATCCCGCGTGGGACGTTGGA  
CCACTGGGACGCTTACAAGGGCGCCAGGGTGGTACTGTGGGACGACTTTG  
GGATGGACAATGTAGTCAAGGATGCCCTGCGCCTGCAGATGCTCGCAGAC  
ACATGCCCCGTCACTCTCAATTGTGACAGGATTGAGAACAAGGAAAGAT  
GTTTACTCTCAGGTCATCATCATCACCACCAACCAGCAGACACCCGTCC  
CCTTGGATTATGTCAACCTTGAGGCCGTTTGCCGGCGCATTGATTTCCCTG  
GTCTATGCTGAGAGCCCCGTGGTTCGATGCTGCGCGAGCCAGGTCCCCTGG  
TGATGTAGCCGCTGTGAAAGCTGCCATGAGGCCCGATTACAGCCACATCA  
ACTTCATTTTGGCCCCCAGGGCGGCTTTGACCGCCAGGGCAACACACCC  
TATGGCAAGGGGGTACGAAGATCATCGGGGCCACTGCCCTCTGCGCCAG  
GGCTGTTGCGCTTGTGCATGAGCGCCATGATGATTTTCGGTCTGCAGAACA  
AAGTCTATGATTTTGTGCTGGCAAGGTTACCGCATTCAGACCATGGCT  
GCTGATGCGGGCATCCCCTGGTATAAGATGGCGGCCATTGGCTACAAGGC  
GATGGGCTGCACCTTGCCTGGAGGAAGCCATGAACCTGCTCAAGGACTATG  
AGGTAGCCCCCTGCCAGGTCATCTACAACGGTGCCACCTACAACGTCAGC  
TGCATCAAGGGGGCCCCCATGGTTGAGAAAAGTCAAGGAGCCTGAACTCCC  
AAAAACACTGGTGAAGTGCCTCAGGCGGATTAAGGAGGCCCGGCTCCGCT  
GTTATTGCAGGATGGCCACAGACGTCATCACCTCCATCCNNNNNNNNNNNN  
NNNNNNNNNNNNNNNNNNNNNNNNNNNNNNNNNNNNNNNNNNNNNNNNNN

>306\_Colon

GCCTCCACCAACTCGGCCCTCAAGGCCGCGCAGGAGATGGGGAAGTTTGC  
GATTGAGGTTTTCAAGCAAATCATGGCCTGGATCTGGCCGTCCGAGGATC  
CGGTACCCGCCCTGCTCTCAAACATGGAGCAGGCTGTCAAGAACGAG  
TGCCAGCTCGAGAACCAACTCACCACCATGTTGAGGGACCGAAATGCAGG  
AGCAGAGTTCTTGAAGGCTCTAGATGAAGAAGAGCAGGAGGTTTCGCAAGA  
TTGCGGCCAAGTGTGGCAATTCTGCCACCACCGGCACGACTAATGCTCTC  
TTGGCTAGGATCAGCATGGCCCGCGCTGCCTTTGAGAAGGCACGAGCCGA  
GCAGACCTCCCGCGTCCGCCAGTTGTGATTATGGTCTCTGGCAGGCCAG  
GCATTGGGAAAACCTTGTCTTCTGCCAGAACCTAGCAAAAAGGATCGCGGCC  
TCGCTGGGGCAGCAGACCTCAGTTGGCATCATCCCGCGTGGGACGTTGGA  
CCACTGGGACGCTTACAAGGGCGCCAGGGTGGTACTGTGGGACGACTTTG  
GGATGGACAATGTAGTCAAGGATGCCCTGCGCCTGCAGATGCTCGCAGAC  
ACATGCCCCGTCACTCTCAATTGTGACAGGATTGAGAACAAGGAAAGAT  
GTTTACTCTCAGGTCATCATCATCACCACCAACCAGCAGACACCCGTCC  
CCTTGGATTATGTCAACCTTGAGGCCGTTTGCCGGCGCATTGATTTCCCTG  
GTCTATGCTGAGAGCCCCGTGGTTCGATGCTGCGCGAGCCAGGTCCCCTGG

TGATGTAGCCGCTGTGAAAGCTGCCATGAGGCCGATTACAGCCACATCA  
ACTTCATTTTTGGCCCCCAGGGCGGCTTTGACCGCCAGGGCAACACACCC  
TATGGCAAGGGGGTCACGAAGATCATCGGGGCCACTGCCCTCTGCGCCAG  
GGCTGTTGCGCTTGTGCATGAGCGCCATGATGATTTTCGGTCTGCAGAACA  
AAGTCTATGATTTTTGATGCTGGCAAGGTTACCGCATTC AAGACCATGGCT  
GCTGATGCGGGCATCCCCTGGTATAAGATGGCGGCCATTGGCTACAAGGC  
GATGGGCTGCACCTTGGTGGAGGAAGCCATGAACCTGCTCAAGGACTATG  
AGGTAGCCCCCTGCCAGGTCTACAACGGTGCCACCTACAACGTCAGC  
TGCATCAAGGGGGCCCCCATGGTTGAGAAAAGTCAAGGAGCCTGAACTCCC  
AAAAACACTGGTGAACCTGCGTCAGGCGGATTAAGGAGGCCCGGCTCCGCT  
GTTATTGCAGGATGGCCACAGACGTCATCACCTCCATCCTGCAGGCGGCT  
GGGACAGCCTTCTCTATCTACCACCA

>307\_M5

GCCTCCACCAACTCGGCCCTCAAGGCCGCCAGGAGATGGGCAAGTTTGC  
GATTGAGGTTTTCAAACAAATCATGGCATGGATCTGGCCCTCTGAGGACC  
CGGTGCCCGCTCTGCTTTCCAACATGGAGCAGGCTGTCATCAAGAACGAG  
TGCCAGCTTGAGAACCAACTCACGACCATGTTGCGGGACCGCAACGCTGG  
AGCTGAGTTCTTGAAGGCACTCGACGAAGAAGAGCAAGAGGTCCGGAAAA  
TTGCAGCCAAGTGTGGAAACTCTGCCACCACGGGCACAACCAACGCCCTG  
TTGGCCAGGATTAGCATGGCTCGCGCAGCCTTTGAGAAGGCTCGCGCTGA  
GCAGACTTCCCGGGTTCCGCCCCGTAGTGATTATGGTCTCTGGCAGGCCCC  
GGATCGGGAAAACTTGTTTTTTGCAGAACCTAGCAAAGAGAATTGCTGCC  
TCCCTCGGGGATGAGACCTCAGTCGGCATCATAACCGCGCCGACGTGGA  
CCACTGGGATGCCTACAAGGGCGCCAGGGTGGTCTCTGGGATGATTTTG  
GCATGGACAATGTGGTGAAGGATGCACTGCGGCTGCAGATGCTTGCTGAC  
ACATGCCCCGTACGCTCAACTGTGACAGGATTGAGAACAAGGGNAAGAT  
GTTTGGATTCTCAAGTTATCATCATCACACGAACCAGCAGACCCCAGTGC  
CTTTGGATTATGTCAACCTTGAGGCGGTCTGCCGCCGATAGACTTCCTG  
GTCTATGCCGAGAGCCCCGTGGTTCGACGCTGCCCGAGCCAGGTACCCGGG  
CGACGTGGCCGCTGTCAAGGCCGCTATGAGGCCAGACTACAGCCATATCA  
ATTTTCATCTTGGCACCGCAGGGTGGCTTTGACCGGCAGGGCAACACCCCC  
TACGGCAAGGGCGTCACTAAGATCATCGGCGCCACCGCGCTCTGTGCAAG  
GGCGGTGCTCTTGTCCATGAGCGTCATGATGATTTTGGCTCCAGAACA  
AAGTCTATGATTTTTGATGCTGGCAAGGTTACCGCTTCAAGACCATGGCG  
GCTGATGCCGGCATCCCCTGGTACAAGATGGCAGCGATTGGCTACAAGGC  
CATGGGCTGCACCTGCGTGGAGGAAGCCATGAACCTACTCAAGGACTATG  
AGGTGGCCCCGTGCCAGGTGATCTACAACGGAGCCACCTACAATGTCAGC  
TGCATCAAGGGGGCGCCCATGGTTGAGAAAAGTCAAGGAGCCTGAGCTGCC  
CAAAACCTTAGTCAATTGTGTGTCAGGAGGATCAAGGAGGCCCGCTCCGCT  
GCTATTGCAGGATGGCCACAGATGTCATCACCTCCATCCTGCAGGCGGCT  
GGGACAGCCTTCTCTATCTACCACCA

>307\_M8

GCCTCCACCAACTCGGCCCTCAAGGCCGCCAGGAGATGGGCAAGTTTGC  
GATTGAGGTTTTCAAACAAATCATGGCATGGATCTGGCCCTCTGAGGACC  
CGGTGCCCGCTCTGCTTTCCAACATGGAGCAGGCTGTCATCAAGAACGAG  
TGCCAGCTTGAGAACCAACTCACGACCATGTTGCGGGACCGCAACGCTGG  
AGCTGAGTTCTTGAAGGCACTCGACGAAGAAGAGCAAGAGGTCCGGAAAA  
TTGCAGCCAAGTGTGGAAACTCTGCCACCACGGGCACAACCAACGCCCTG  
TTGGCCAGGATTAGCATGGCTCGCGCAGCCTTTGAGAAGGCTCGCGCTGA  
GCAGACTTCCCGGGTTCCGCCCCGTAGTGATTATGGTCTCTGGCAGGCCCC  
GGATCGGGAAAACTTGTTTTTTGCAGAACCTAGCAAAGAGAATTGCTGCC  
TCCCTCGGGGATGAGACCTCAGTCGGCATCATAACCGCGCCGACGTGGA  
CCACTGGGATGCCTACAAGGGCGCCAGGGTGGTCTCTGGGATGATTTTG  
GCATGGACAATGTGGTGAAGGATGCACTGCGGCTGCAGATGCTTGCTGAC  
ACATGCCCCGTACGCTCAACTGTGACAGGATTGAGAACAAGGGGAAGAT  
GTTTGGATTCTCAAGTTATCATCATCACACGAACCAGCAGACCCCAGTGC  
CTTTGGATTATGTCAACCTTGAGGCGGTCTGCCGCCGATAGACTTCCTG  
GTCTATGCCGAGAGCCCCGTGGTTCGACGCTGCCCGAGCCAGGTACCCGGG  
CGACGTGGCCGCTGTCAAGGCCGCTATGAGGCCAGACTACAGCCATATCA  
ATTTTCATCTTGGCACCGCAGGGTGGCTTTGACCGGCAGGGCAACACCCCC  
TACGGCAAGGGCGTCACTAAGATCATCGGCGCCACCGCGCTCTGTGCAAG

GGCGGTGCTCTTGTCCATGAGCGTCATGATGATTTTGGCTCCAGAACA  
AAGTCTATGATTTTGGATGCTGGCAAGGTTACCGCTTCAAGACCATGGCG  
GCTGATGCCGGCATCCCCTGGTACAAGATGGCAGCGATTGGCTACAAGGC  
CATGGGCTGCACCTGCGTGGAGGAAGCCATGAACCTACTCAAGGACTATG  
AGGTGGCCCCGTGCCAGGTGATCTACAACGGAGCCACCTACAATGTCAGC  
TGCATCAAGGGGGCGCCCATGGTTGAGAAAAGTCAAGGAGCCTGAGCTGCC  
CAAAACCCTAGTCAATTGTGTGTCAGGAGGATCAAGGAGGCCCGCTCCGCT  
GCTATTGCAGGATGGCCACAGATGTCATCACCTCCATCCTGCAGGCGGT  
GGGACAGCCTTCTCTATCTACCACCA

>308\_M5

GCCTCCACCAACTCGGCCCTCAAGGCCGCCAGGAGATGGGCAAGTTTGC  
GATTGAGGTTTTCAAACAAATCATGGCATGGATCTGGCCCTCTGAGGACC  
CGGTGCCCCGCTCTGCTTTCCAACATGGAGCAGGCTGTCATCAAGAACGAG  
TGCCAGCTTGAGAACCAACTCACGACCATGTTGCGGGACCGCAACGCTGG  
AGCTGAGTTCTTGAAGGCACTCGACGAAGAAGAGCAAGAGGTCCGGAAAA  
TTGCAGCCAAGTGTGGAAACTCTGCCACCACGGGCACAACCAACGCCCTG  
TTGGCCAGGATTAGCATGGCTCGCGCAGCCTTTGAGAAGGCTCGCGCTGA  
GCAGACTTCCCAGGTTTCGCCCCGTAGTGATTATGGTCTCTGGCAGGCCCC  
GGATCGGGAAAACTTGTTTTTTGCAGAACCTAGCAAAGAGAATTGCTGCC  
TCCCTCGGGGATGAGGCCTCAGTCGGCATCATAACCGCGCGCCGACGTGGA  
CCACTGGGATGCCTACAAGGGCGCCAGGGTGGTCTCTGGGATGATTTTG  
GCATGGACAATGTGGTGAAGGATGCACTGCGGCTGCAGATGCTTGCTGAC  
ACATGCCCCGTACGCTCAACTGTGACAGGATTGAGAACAAGGGGAAGAT  
GTTTGATTCTCAAGTTATCATCATCACACGAACCAGCAGACCCCAGTGC  
CTTTGGATTATGTCAACCTTGAGGCGGTCTGCCGCCGATAGACTTCCTG  
GTCTATGCCGAGAGCCCCGTGGTTCGACGCTGCCCGAGCCAGGTCACCGGG  
CGACGTGGCCGCTGTCAAGGCCGCTATGAGGCCAGACTACAGCCATATCA  
ATTTTCATCTTGGCACCCGAGGGTGGCTTTGACCGGCAGGGCAACACCCCC  
TACGGCAAGGGCGTCACTAAGATCATCGGCGCCACCGCGCTCTGTGCAAG  
GGCGGTGCTCTTGTCCATGAGCGTCATGATGATTTTGGCTCCAGAACA  
AAGTCTATGATTTTGGATGCTGGCAAGGTTACCGCTTCAAGACCATGGCG  
GCTGATGCCGGCATCCCCTGGTACAAGATGGCAGCGATTGGCTACAAGGC  
CATGGGCTGCACCTGCGTGGAGGAAGCCATGAACCTACTCAAGGACTATG  
AGGTGGCCCCGTGCCAGGTGATCTACAACGGAGCCACCTACAATGTCAGC  
TGCATCAAGGGGGCGCCCATGGTTGAGAAAAGTCAAGGAGCCTGAGCTGCC  
CAAAACCCTAGTCAATTGTGTGTCAGGAGGATCAAGGAGGCCCGCTCCGCT  
GCTATTGCAGGATGGCCACAGATGTCATCACCTCCATCCTGCAGGCGGT  
GGGACAGCCTTCTCTATCTACCACCA

>308\_Colon

GCCTCCACCAACTCGGCCCTCAAGGCCGCCAGGAGATGGGCAAGTTTGC  
GATTGAGGTTTTCAAACAAATCATGGCATGGATCTGGCCCTCTGAGGACC  
CGGTGCCCCGCTCTGCTTTCCAACATGGAGCAGGCTGTCATCAAGAACGAG  
TGCCAGCTTGAGAACCAACTCACGCCATGTTGCGGGACCGCAACGCTGG  
AGCTGAGTTCTTGAAGGCACTCGACGAAGAAGAGCAAGAGGTCCGGAAAA  
TTGCAGCCAAGTGTGGAAACTCTGCCACCACGGGTACAACCAACGCCCTG  
TTGGCCAGGATTAGCATGGCTCGCGCAGCCTTTGAGAAGGCTCGCGCTGA  
GCAGACTTCCCAGGTTTCGCCCCGTAGTGATTATGGTCTCTGGCAGGCCCC  
GGATCGGGAAAACTTGTTTTTTGCAGAACCTAGCAAAGAGAATTGCTGCC  
TCCCTCGGGGATGAGGCCTCAGTCGGCATCATAACCGCGCGCCGACGTGGA  
CCACTGGGATGCCTACAAGGGCGCCAGGGTGGTCTCTGGGATGATTTTG  
GCATGGACAATGTGGTGAAGGATGCACTGCGGCTACAGATGCTTGCTGAC  
ACATGCCCCGTACGCTCAACTGTGACAGGATTGAGAACAAGGGGAAGAT  
GTTTGATTCTCAAGTTATCATCATCACACGAACCAGCAGACCCCAGTGC  
CTTTGGATTATGTCAACCTTGAGGCGGTCTGCCGCCGATAGACTTCCTG  
GTCTATGCCGAGAGCCCCGTGGTTCGACGCTGCCCGAGCCAGGTCACCGGG  
CGACGTGGCCGCTGTCAAGGCCGCTATGAGGCCAGACTACAGCCATATCA  
ATTTTCATCTTGGCACCCGAGGGTGGCTTTGACCGGCAGGGCAACACCCCC  
TACGGCAAGGGCGTCACTAAGATCATCGGCGCCACCGCGCTCTGTGCAAG  
GGCGGTGCTCTTGTCCATGAGCGTCATGATGATTTTGGCTCCAGAACA  
AAGTCTATGATTTTGGATGCTGGCAAGGTTACCGCTTCAAGACCATGGCG  
GCTGATGCCGGCATCCCCTGGTACAAGATGGCAGCGATTGGCTACAAGGC

CATGGGCTGCACCTGCGTGGAGGAAGCCATGAACCTACTCAAGGACTATG  
AGGTGGCCCCGTGCCAGGTGATCTACAATGGAGCCACCTACAATGTCAGC  
TGCATCAAGGGGGCGCCCATGGTTGAGAAAAGTCAAGGAGCCTGAGCTGCC  
CAAAACCCTAGTCAATTGTGTGTCAGGAGGATCAAGGAGCCCCGCTCCGCT  
GCTATTGTAGGATGGCCACAGATGTCATCACCTCCATCCTGCAGGCGGCT  
GGGACAGCCTTCTCTATCTACCACCA

>308\_MLN

GCCTCCACCAACTCGGCCCTCAAGGCCGCCAGGAGATGGGCAAGTTTGC  
GATTGAGGTTTTCAAACAAATCATGGCATGGATCTGGCCCTCTGAGGACC  
CGGTGCCCGCTCTGCTTTTCCAACATGGAGCAGGCTGTCATCAAGAACGAG  
TGCCAGCTTGAGAACCACTCACGGCCATGTTGCGGGACCGCAACGCTGG  
AGCTGAGTTCTTGAAGGCACTCGACGAAGAAGAGCAAGAGGTCCGGAAAA  
TTGCAGCCAAGTGTGGAAACTCTGCCACCACGGGTACAACCAACGCCCTG  
TTGGCCAGGATTAGCATGGCTCGCGCAGCCTTTGAGAAGGCTCGCGCTGA  
GCAGACTTCCCGGGTTTCGCCCCGTAGTGATTATGGTCTCTGGCAGGCCCC  
GGATCGGGAAAACTTGTTTTTTCCAGAACCTAGCAAAGAGAATTGCTGCC  
TCCCTCGGGGATGAGGCCTCAGTCGGCATCATAACCGCGCGCCGACGTGGA  
CCACTGGGATGCCTACAAGGGCGCCAGGGTGGTCTCTGGGATGATTTTG  
GCATGGACAATGTGGTGAAGGATGCACTGCGGCTACAGATGCTTGCTGAC  
ACATGCCCCGTACGCTCAACTGTGACAGGATTGAGAACAAGGGGAAGAT  
GTTTGATTCTCAAGTTATCATCATCACCACGAACCAGCAGACCCCAGTGC  
CTTTGGATTATGTCAACCTTGAGGCGGTCTGCCGCCGCATAGACTTCCCTG  
GTCTATGCCGAGAGCCCCGTGGTTCGACGCTGCCCGAGCCAGGTCACCGGG  
CGACGTGGCCGCTGTCAAGGCCGCTATGAGGCCAGACTACAGCCATATCA  
ATTTTCATCTTGGCACCGCAGGGTGGCTTTGACCGGCAGGGCAACACCCCC  
TACGGCAAGGGCGTCACTAAGATCATCGGCGCCACCGCGCTCTGTGCAAG  
GGCGGTGCTCTTGTCCATGAGCGTCATGATGATTTTGGCTCCAGAACA  
AAGTCTATGATTTTGTGCTGGCAAGGTTACCGCTTCAAGACCATGGCG  
GCTGATGCCGGCATCCCCCTGGTACAAGATGGCAGCGATTGGCTACAAGGC  
CATGGGCTGCACCTGCGTGGAGGAAGCCATGAACCTACTCAAGGACTATG  
AGGTGGCCCCGTGCCAGGTGATCTACAATGGAGCCACCTACAATGTCAGC  
TGCATCAAGGGGGCGCCCATGGTTGAGAAAAGTCAAGGAGCCTGAGCTGCC  
CAAAACCCTAGTCAATTGTGTGTCAGGAGGATCAAGGAGCCCCGCTCCGCT  
GCTATTGTAGGATGGCCACAGATGTCATCACCTCCATCCTGCAGGCGGCT  
GGGACAGCCTTCTCTATCTACCACCA

>309\_M5

GCCTCCACCAACTCGGCCCTCAAGGCCGCCAGGAGATGGGCAAGTTTGC  
GATTGAGGTTTTCAAACAAATCATGGCATGGATCTGGCCCTCTGAGGACC  
CGGTGCCCGCTCTGCTTTTCCAACATGGAGCAGGCTGTCATCAAGAACGAG  
TGCCAGCTTGAGAATCAACTCACGGCCATGTTGCGGGACCGCAACGCTGG  
AGCTGAGTTCTTGAAGGCACTCGACGAAGAAGAGCAAGAGGTCCGGAAAA  
TAGCAGCCAAGTGTGGAAACTCTGCCACCACGGGCACAACCAACGCCCTG  
TTGGCCAGGATTAGCATGGCTCGCGCAGCCTTTGAGAAGGCTCGCGCTGA  
GCAGACTTCCCGGGTTTCGCCCCGTAGTGATTATGGTCTCTGGCAGGCCCC  
GGATCGGGAAAACTTGTTTTTTCCAGAACCTAGCAAAGAGAATTGCTGCC  
TCCCTCGGGGATGAGACCTCAGTCGGCATCATAACCGCGCGCCGACGTGGA  
CCACTGGGATGCCTACAAGGGCGCCAGGGTGGTCTCTGGGATGATTTTG  
GCATGGACAATGTGGTGAAGGATGCACTGCGGCTGCAGATGCTTGCTGAC  
ACATGCCCCGTACGCTCAACTGTGACAGGATTGAGAACAAGGGGAAGAT  
GTTTGATTCTCAAGTTATCATCATCACCACGAACCAGCAGACCCCAGTGC  
CTTTGGATTATGTCAACCTTGAGGCGGTCTGCCGCCGCATAGACTTTCCTG  
GTCTATGCCGAGAGCCCCGTGGTTCGACGCTGCCCGAGCCAGGTCACCGGG  
CGACGTGGCCGCTGTCAAGGCCGCTATGAGGCCAGACTACAGCCATATCA  
ATTTTCATCTTGGCACCGCAGGGTGGCTTTGACCGGCAGGGCAACACCCCC  
TACGGCAAGGGCGTCACTAAGATCATCGGCGCCACCGCGCTCTGTGCAAG  
GGCGGTGCTCTTGTCCATGAGCGTCATGATGATTTTGGCTCCAGAACA  
AAGTCTATGATTTTGTGCTGGCAAGGTTACCGCTTCAAGACCATGGCG  
GCTGATGCCGGCATCCCCCTGGTACAAGATGGCAGCGATTGGCTACAAGGC  
CATGGGCTGCACCTGCGTGGAGGAAGCCATGAACCTACTCAAGGACTATG  
AGGTGGCCCCGTGCCAGGTGATCTACAACGGAGCCACCTACAATGTCAGC  
TGCATCAAGGGGGCGCCCATGGTTGAGAAAAGTCAAGGAGCCTGAGCTGCC

CAAAACCCCTAGTCAATTGTGTGTCAGGAGGATCAAGGAGGCCCGCCTCCGCT  
GCTATTGCAGGATGGCCACAGATGTCATCACCTCCATCCTGCAGGCGGCT  
GGGACAGCCTTCTCTATCTACCACCA

>309\_M8

GCCTCCACCAACTCGGCCCTCAAGGCCGCCAGGAGATGGGCAAGTTTGC  
GATTGAGGTTTTCAAACAAATCATGGCATGGATCTGGCCCTCTGAGGACC  
CGGTGCCCCGCTCTGCTTTCCAACATGGAGCAGGCTGTCATCAAGAACGAG  
TGCCAGCTTGAGAATCAACTCACGGCCATGTTGCGGGACCGCAACGCTGG  
AGCTGAGTTCTTGAAGGCACTCGACGAAGAAGAGCAAGAGGTCCGGAAAA  
TTGCAGCCAAGTGTGGAAACTCTGCCACCACGGGCACAACCAACGCCCTG  
TTGGCCAGGATTAGCATGGCTCGCGCAGCCTTTGAGAAGGCTCGCGCTGA  
GCAGACTTCCCAGGTTTCGCCCCGTAGTGATTATGGTCTCTGGCAGGCCCC  
GGATCGGGAAAACTTGTTTTTTGCAGAACCTAGCAAAGAGAATTGCTGCC  
TCCCTCGGGGATGAGACCTCAGTCGGCATCATAACCGCGCGCCGACGTGGA  
CCACTGGGATGCCTACAAGGGCGCCAGGGTGGTCTCTGGGATGATTTTG  
GCATGGACAATGTGGTGAAGGATGCACTGCGGCTGCAGATGCTTGCTGAC  
ACATGCCCCGTACGCTCAACTGTGACAGGATTGAGAACAAGGGGAAGAT  
GTTTGATTCTCAAGTTATCATCATCACACGAACCAGCAGACCCCAGTGC  
CTTTGGATTATGTCAACCTTGAGGCGGTCTGCCGCCGATAGACTTTCTG  
GTCTATGCCGAGAGCCCCGTGGTTCGACGCTGCCGAGCCAGGTCACCGGG  
CGACGTGGCCGCTGTCAAGGCCGCTATGAGGCCAGACTACAGCCATATCA  
ATTTTCATCTTGGCACCGCAGGGTGGCTTTGACCGGCAGGGCAACACCCCC  
TACGGCAAGGGCGTCACTAAGATCATCGGCGCCACCGCGCTCTGTGCAAG  
GNGCGTGCCTTTGTCCATGAGCGTCATGATGATTTTGGCTCCAGAACA  
AAGTCTATGATTTTGTGCTGGCAAGGTTACCGCTTCANGACCATGGCG  
GCTGATGCCGGCATCCCCTGGTACAAGATGGCAGCGATTGGCTACAAGGC  
CATGGGCTGCACCTGCGTGGAGGAAGCCATGAACCTACTCAAGGACTATG  
AGGTGGCCCCGTGCCAGGTGATCTACAACGGAGCCACCTACAATGTCAGC  
TGCATCAAGGGGGCGCCCATGGTTGAGAAAAGTCAAGGAGCCTGAGCTGCC  
CAAAAACCCCTAGTCAATTGTGTGTCAGGAGGATCAAGGAGGCCCGCCTCCGCT  
GCTATTGCAGGATGGCCACAGATGTCATCACCTCCATCCTGCAGGCGGCT  
GGGACAGCCTTCTCTATCTACCACCA

>309\_Cae

GCCTCCACCAACTCGGCCCTCAAGGCCGCCAGGAGATGGGCAAGTTTGC  
GATTGAGGTTTTCAAACAAATCATGGCATGGATCTGGCCCTCTGAGGACC  
CGGTGCCCCGCTCTGCTTTCCAACATGGAGCAGGCTGTCATCAAGAACGAG  
TGCCAGCTTGAGAATCAACTCACGGCCATGTTGCGGGACCGCAACGCTGG  
AGCTGAGTTCTTGAAGGCACTCGACGAAGAAGAGCAAGAGGTCCGGAAAA  
TTGCAGCCAAGTGTGGAAACTCTGCCACCACGGGCACAACCAACGCCCTG  
TTGGCCAGGATTAGCATGGCTCGCGCAGCCTTTGAGAAGGCTCGCGCTGA  
GCAGACTTCCCAGGTTTCGCCCCGTAGTGATTATGGTCTCTGGCAGGCCCC  
GGATCGGGAAAACTTGTTTTTTGCAGAACCTAGCAAAGAGAATTGCTGCC  
TCCCTCGGGGATGAGACCTCAGTCGGCATCATAACCGCGCGCCGACGTGGA  
CCACTGGGATGCCTACAAGGGCGCCAGGGTGGTCTCTGGGATGATTTTG  
GCATGGACAATGTGGTGAAGGATGCACTGCGGCTGCAGATGCTTGCTGAC  
ACATGCCCCGTACGCTCAACTGTGACAGGATTGAGAACAAGGGGAAGAT  
GTTTGATTCTCAAGTTATCATCATCACACGAACCAGCAGACCCCAGTGC  
CTTTGGATTATGTCAACCTTGAGGCGGTCTGCCGCCGATAGACTTTCTG  
GTCTATGCCGAGAGCCCCGTGGTTCGACGCTGCCGAGCCAGGTCACCGGG  
CGACGTGGCCGCTGTCAAGGCCGCTATGAGGCCAGACTACAGCCATATCA  
ATTTTCATCTTGGCACCGCAGGGTGGCTTTGACCGGCAGGGCAACACCCCC  
TACGGCAAGGGCGTCACTAAGATCATCGGCGCCACCGCGCTCTGTGCAAG  
GGCGGTGCCTTTGTCCATGAGCGTCATGATGATTTTGGCTCCANAACA  
AAGTCTATGATTTTGTGCTGGCAAGGTTACCGCTTCAGACCATGGCG  
GCTGATGCCGGCATCCCCTGGTACAAGATGGCAGCGATTGGCTACAAGGC  
CATGGGCTGCACCTGCGTGGAGGAAGCCATGAACCTACTCAAGGACTATG  
AGGTGGCCCCGTGCCAGGTGATCTACAACGGAGCCACCTACAATGTCAGC  
TGCATCAAGGGGGCGCCCATGGTTGAGAAAAGTCAAGGAGCCTGAGCTGCC  
CAAAAACCCCTAGTCAATTGTGTGTCAGGAGGATCAAGGAGGCCCGCCTCCGCT  
GCTATTGCAGGATGGCCACAGATGTCATCACCTCCATCCTGCAGGCGGCT  
GGGACAGCCTTCTCTATCTACCACCA

>309\_Colon

GCCTCCACCAACTCGGCCCTCAAGGCCGCCAGGAGATGGGCAAGTTTGC  
GATTGAGGTTTTCAAACAAATCATGGCATGGATCTGGCCCTCTGAGGACC  
CGGTGCCCGCTCTGCTTTCCAACATGGAGCAGGCTGTCATCAAGAACGAG  
TGCCAGCTTGAGAACCAACTCACGACCATGTTGCGGGACCGCAACGCTGG  
AGCTGAGTTCTTGAAGGCACTCGACGAAGAAGAGCAAGAGGTCCGGAAAA  
TTGCAGCCAAGTGTGGAAACTCTGCCACCACGGGCACAACCAACGCCCTG  
TTGGCCAGGATTAGCATGGCTCGCGCAGCCTTTGAGAAGGCTCGCGCTGA  
GCAGACTTCCC GGTTTCGCCCCGTAGTGATTATGGTCTCTGGCAGGCCCC  
GGATCGGGAAAACCTTGTTTTTGCAGAACCTAGCAAAGAGAAATTGCTGCC  
TCCCTCGGGGATGAGACCTCAGTCGGCATCATAACCGCGCGCCGACGTGGA  
CCACTGGGATGCCTACAAGGGCGCCAGGGTGGTCTCTGGGATGATTTTG  
GCATGGACAATGTGGTGAAGGATGCACTGCGGCTGCAGATGCTTGCTGAC  
ACATGCCCCGTACGCTCAACTGTGACAGGATTGAGAACAAGGGGAAGAT  
GTTTGATTCTCAAGTTATCATCATCACCACGAACCAGCAGACCCCAGTGC  
CTTTGGATTATGTCAACCTTGAGGCGGTCTGCCGCCGCATAGACTTCCCTG  
GTCTATGCCGAGAGCCCCGTGGTTCGACGCTGCCGAGCCAGGTCACCGGG  
CGACGTGGCCGCTGTCAAGGCCGCTATGAGGCCAGACTACAGCCATATCA  
ATTTTCATCTTGGCACCGCAGGGTGGCTTTGACCGGCAGGGCAACACCCCC  
TACGGCAAGGGCGTCACTAAGATCATCGGCGCCACCGCGCTCTGTGCAAG  
GGCGGTGCTCTTGTCCATGAGCGTCATGATGATTTTGGCTCCAGAACA  
AAGTCTATGATTTTGATGCTGGCAAGGTTACCGCTTCAAGACCATGGCG  
GCTGATGCCGGCATCCCCTGGTACAAGATGGCAGCGATTGGCTACAAGGC  
CATGGGCTGCACCTGCGTGGAGGAAGCCATGAACCTACTCAAGGACTATG  
AGGTGGCCCCGTGCCAGGTGATCTACAACGGAGCCACCTACAATGTCAGC  
TGCATCAAGGGGGCGCCATGGTTGAGAAAAGTCAAGGAGCCTGAGCTGCC  
CAAAACCCTAGTCAATTGTGTGTCAGGAGGATCAAGGAGGCCCGCTCCGCT  
GCTATTGCAGGATGGCCACAGATGTCATCACCTCCATCCTGCAGGCGGCT  
GGGACAGCCTTCTCTATCTACCACCA

>310\_M5

NNNNNNNNNNNNNNNNNNNTCAAGGCCGCCAGGAGATGGGCAAGTTTGC  
GATTGAGGTTTTCAAACAAATCATGGCATGGATCTGGCCCTCTGAGGACC  
CGGTGCCCGCTCTGCTTTCCAACATGGAGCAGGCTGTCATCAAGAACGAG  
TGCCAGCTTGAGAATCAACTCACGGCCATGTTGCGGGACCGCAACGCTGG  
AGCTGAGTTCTTGAAGGCACTCGACGAAGAAGAGCAAGAGGTCCGGAAAA  
TTGCAGCCAAGNGTGGAAACTCTGCCACCACGGGCACAACCAACGCCCTG  
TTGGCCAGGATTAGCATGGCTCGCGCAGCCTTTGAGAAGGCTCGCGCTGA  
GCAGACTTCCC GGTTTCGCCCCGTAGTGATTATGGTCTCTGGCAGGCCCC  
GGATCGGGAAAACCTTGTTTTTGCAGAACCTAGCAAAGAGAAATTGCTGCC  
TCCCTCGGGGATGAGACCTCAGTCGGCATCATAACCGCGCGCCGACGTGGA  
CCACTGGGATGCCTACAAGGGCGCCAGGGTGGTCTCTGGGATGATTTTG  
GCATGGACAATGTGGTGAAGGATGCACTGCGGCTGCAGATGCTTGCTGAC  
ACATGCCCCGTACGCTCAACTGTGACAGGATTGAGAACAAGGGGAAGAT  
GTTTGATTCTCAAGTTATCATCATCACCACGAACCAGCAGACCCCAGTGC  
CTTTGGATTATGTCAACCTTGAGGCGGTCTGCCGCCGCATAGACTTTCTG  
GTCTATGCCGAGAGCCCCGTGGTTCGACGCTGCCGAGCCAGGTCACCGGG  
CGACGTGGCCGCTGTCAAGGCCGCTATGAGGCCAGACTACAGCCATATCA  
ATTTTCATCTTGGCACCGCAGGGTGGCTTTGACCGGCAGGGCAACACCCCC  
TACGGCAAGGGCGTCACTAAGATCATCGGCGCCACCGCGCTCTGTGCAAG  
GGCGGTGCTCTTGTCCATGAGCGTCATGATGATTTTGGCTCCAGAACA  
AAGTCTATGATTTTGATGCTGGCAAGGTTACCGCTTCAAGACCATGGCG  
GCTGATGCCGGCATCCCCTGGTACAAGATGGCAGCGATTGGCTACAAGGC  
CATGGGCTGCACCTGCGTGGAGGAAGCCATGAACCTACTCAAGGACTATG  
AGGTGGCCCCGTGCCAGGTGATCTACAACGGAGCCACCTACAATGTCAGC  
TGCATCAAGGGGGCGCCATGGTTGAGAAAAGTCAAGGAGCCTGAGCTGCC  
CAAAACCCTAGTCAATTGTGTGTCAGGAGGATCAAGGAGGCCCGCTCCGCT  
GCTATTGCAGGATGGCCACAGATGTCATCACCTCCATCCTGCAGGCGGCT  
GGGACAGCCTTCTCTATCTACCACCA

>310\_M8

GCCTCCACCAACTCGGCCCTCAAGGCCGCCAGGAGATGGGCAAGTTTGC  
GATTGAGGTTTTCAAACAAATCATGGCATGGATCTGGCCCTCTGAGGACC

CGGTGCCCGCTCTGCTTTCCAACATGGAGCAGGCTGTCATCAAGAACGAG  
TGCCAGCTTGAGAATCAACTCACGGCCATGTTGCGGGACCGCAACGCTGG  
AGCTGAGTTCTTGAAGGCACTCGACGAAGAAGAGCAAGAGGTCCGGAAAA  
TTGCAGCCAAGTGTGGAAACTCTGCCACCACGGGCACAACCAACGCCCTG  
TTGGCCAGGATTAGCATGGCTCGCGCAGCCTTTGAGAAGGCTCGCGCTGA  
GCAGACTTCCCAGGTTTCGCCCCGTAGTGATTATGGTCTCTGGCAGGCCCC  
GGATCGGGAAAACTTGTTTTTGCCAGAACCCTAGCAAAGAGAATTGCTGCC  
TCCCTCGGGGATGAGACCTCAGTCGGCATCATAACCGCGCGCCGACGTGGA  
CCACTGGGATGCCTACAAGGGCGCCAGGGTGGTCTCTGGGATGATTTTG  
GCATGGACAATGTGGTGAAGGATGCACTGCGGCTGCAGATGCTTGCTGAC  
ACATGCCCCGTACGCTCAACTGTGACAGGATTGAGAACAAGGGGAAGAT  
GTTTGATTCTCAAGTTATCATCATCACCACGAACCAGCAGACCCCAGTGC  
CTTTGGATTATGTCAACCTTGAGGCGGTCTGTGCCCGCATAGACTTTCTG  
GTCTATGCCGAGAGCCCCGTGGTTCGACGCTGCCCGAGCCAGGTCACCGGG  
CGACGTGGCCGCTGTCAAGGCCGCTATGAGGCCAGACTACAGCCATATCA  
ATTTTCATCTTGGCACCGCAGGGTGGCTTTGACCGGCAGGGCAACACCCCC  
TACGGCAAGGGCGTCACTAAGATCATCGGCGCCACCGCGCTCTGTGCAAG  
GGCGGTGCTCTTGTCCATGAGCGTCATGATGATTTTGGCTCCAGAACA  
AAGTCTATGATTTTGTGCTGGCAAGGTTACCGCTTCAAGACCATGGCG  
GCTGATGCCGGCATCCCCTGGTACAAGATGGCAGCGATTGGCTACAAGGC  
CATGGGCTGCACCTGCGTGGAGGAAGCCATGAACCTACTCAAGGACTATG  
AGGTGGCCCCGTGCCAGGTGATCTACAACGGAGCCACCTACAATGTCAGC  
TGCATCAAGGGGGCGCCCATGGTTGAGAAAAGTCAAGGAGCCTGAGCTGCC  
CAAAACCCTAGTCAATTGTGTGTCAGGAGGATCAAGGAGGCCCGCTCCGCT  
GCTATTGCAGGATGGCCACAGATGTCATCACCTCCATCCTGCAGGCGGT  
GGGACAGCCTTCTCTATCTACCACCA

>310\_Colon

GCCTCCACCAACTCGGCCCTCAAGGCCGCCAGGAGATGGGCAAGTTTGC  
GATTGAGTTTTTCAAACAAATCATGGCATGGATCTGGCCCTCTGAGGACC  
CGGTGCCCGCTCTGCTTTCCAACATGGAGCAGGCTGTCATCAAGAACGAG  
TGCCAGCTTGAGAACCAACTCACGACCATGTTGCGGGACCGCAACGCTGG  
AGCTGAGTTCTTGAAGGCACTCGACGAAGAAGAGCAAGAGGTCCGGAAAA  
TTGCAGCCAAGTGTGGAAACTCTGCCACCACGGGCACAACCAACGCCCTG  
TTGGCCAGGATTAGCATGGCTCGCGCAGCCTTTGAGAAGGCTCGCGCTGA  
GCAGACTTCCCAGGTTTCGCCCCGTAGTGATTATGGTCTCTGGCAGGCCCC  
GGATCGGGAAAACTTGTTTTTGCCAGAACCCTAGCAAAGAGAATTGCTGCC  
TCCCTCGGGGATGAGACCTCAGTCGGCATCATAACCGCGCGCCGACGTGGA  
CCACTGGGATGCCTACAAGGGCGCCAGGGTGGTCTCTGGGATGATTTTG  
GCATGGACAATGTGGTGAAGGATGCACTGCGGCTGCAGATGCTTGCTGAC  
ACATGCCCCGTACGCTCAACTGTGACAGGATTGAGAACAAGGGGAAGAT  
GTTTGATTCTCAAGTTATCATCATCACCACGAACCAGCAGACCCCAGTGC  
CTTTGGATTATGTCAACCTTGAGGCGGTCTGTGCCCGCATAGACTTCCCTG  
GTCTATGCCGAGAGCCCCGTGGTTCGACGCTGCCCGAGCCAGGTCACCGGG  
CGACGTGGCCGCTGTCAAGGCCGCTATGAGGCCAGACTACAGCCATATCA  
ATTTTCATCTTGGCACCGCAGGGTGGCTTTGACCGGCAGGGCAACACCCCC  
TACGGCAAGGGCGTCACTAAGATCATCGGCGCCACCGCGCTCTGTGCAAG  
GGCGGTGCTCTTGTCCATGAGCGTCATGATGATTTTGGCTCCAGAACA  
AAGTCTATGATTTTGTGCTGGCAAGGTTACCGCTTCAAGACCATGGCG  
GCTGATGCCGGCATCCCCTGGTACAAGATGGCAGCGATTGGCTACAAGGC  
CATGGGCTGCACCTGCGTGGAGGAAGCCATGAACCTACTCAAGGACTATG  
AGGTGGCCCCGTGCCAGGTGATCTACAACGGAGCCACCTACAATGTCAGC  
TGCATCAAGGGGGCGCCCATGGTTGAGAAAAGTCAAGGAGCCTGAGCTGCC  
CAAAACCCTAGTCAATTGTGTGTCAGGAGGATCAAGGAGGCCCGCTCCGCT  
GCTATTGCAGGATGGCCACAGATGTCATCACCTCCATCCTGCAGGCGGT  
GGGACAGCCTTCTCTATCTACCACCA

## Region 2

>F1+2

TTCCGCACGGGATGGGGCTTTTGGGTTAGCGGCCATGTGTTTCATCACCGC  
TAAACATGTGGCGCCACCCAAGGGCACCGAGGTGTTTCGGGCGCAAGCCCC



AGGAATTACACCGTACCTCCAGTGGGGACTTCTGAAATACCACTTCACC  
AGTGCTGTGAGGCCTGACATTCCTGCCATGGTTCTTGAGAATGGCTGCCA  
GGAGGGTGTGTTGCTTCGGTCTCGTCAAGAGGGCTCCGGAGAGATGC  
TCGCCCTGGCGGTGAGGATGGGTCTCAGGCCCATCAAGATCGGCAAC  
GCAGTGGTGCAGGTCAGACTGGGATGCTTCTCACAGNNTCCAATGCCAA  
AGCCCAGGACCTCGGAACCATCCCCGGCGATTGCGGCTGCCCTATGTCT  
ACAAAAAGGGCAACACCTGGGTGTGATTGGTGTGCACGTGGCGGCCACC  
AGGTCCGGGAACACGGTGATCGCTGCTACCCATGGGGAACCCACCCCTTGA  
GGCGCTGGAGTTCCAAGGACCCCCATGCTCCCTCGTCCCTCTGGCACCT  
ATGTAGGCCTCCCCATTGCAGACTATGGTGATGCCCTCCCTCAGCACC  
AAGACCATGTTCTGGCGCACTTCTCCAGAGAAGCTGCCGCTGGGGCATG  
GGAGCCCCTTACCTGGGTCCAAGGATGAGAGGGTGGACGGTCCCTCCC  
TCCAGCAGGTTATGCGAGACCAGCTCAAGCCCTACTCCGAGCCTCGTGGA  
TTACTCCCCCGCAGGAGATTTTGGACGCAGTTTGTGATGCCATCGAGAA  
CCGACTTGAGAATACGCTGGAGCCCCAGAAGCCCTGGACCTTTAAGAAA  
CCTGCGAGAGCCTTGATAAAGAACAACACTAGCAGTGGCTATCCCTACCACAA  
CAGAAGAGTAGGACTGGACGGGCACCCGCTTCATTGGTGAGCTCGGTGA  
TCAAGCCACCCATGCCAACAAAC

>MN1

TTCCGGCACGGGGTGGGGCTTTTGGGTGAGCGGCCACGTCTTCATCACCCG  
CAAGCATGTGGCGCCCCAAGGGCACGGAGATCTTTGGGCGCAAGCCCC  
GGGACTTCACTGCTCACTTCCAGCGGGGACTTCTTGAAGTACTACTTCACC  
AGCGCCGTGAGGCCTGACATTCCTGCCATGGTCTTGAGAATGGGTGCCA  
GGAGGGCGTTCGTCGCTCGGTCTTGTCAAGAGAGCTCCGGCGAGATGC  
TTGCCCTGGCTGTGAGGATGGGTTCACAGGCCCATCAAGATTGGTAGT  
GCCGTTGTGCATGGGCAAACTGGCATGCTCCTGACTGGCTCTAATGCCAA  
GGCCCAGGACCTCGGGACCATCCCGGGCGACTGTGGCTGTCCCTATGTTT  
ATAAGAAGGGTAACACCTGGGTGTGATTGGGGTGCACGTGGCGGCCACT  
AGGTCTGGTAACACAGTCATTGCCGCGCACTCACGGAGAACCACACTTGA  
GGCTCTGGAGTTCCAGGGACCCCCATGCTTCCCCGCCCTCAGGCACCT  
ATGCAGGCCTCCCCATCGCCGATTACGGCGACGCTCCCCCTTGAGCACC  
AAGACCATGTTCTGGCGTACCTCGCCAGAGAAGCTTCCCCCTGGGGCTTG  
GGAGCCAGCCTATCTCGGCTCTAAAGATGAGAGGGTGGACGGTCCCTTCCC  
TTCAGCAGGTGATGCGAGATCAGCTTAAGCCCTATTCAGAACCACGCGGT  
CTGCTTCCCCCTCAAGAAATCCTTGATGCAGTCTGCGACGCCATTGAGAA  
CCGCTTGAGAACACCCCTTGAACCACAGAAGCCCTGGACATTTAAGAAGG  
CTTGTGAGAGCTTGGACAAGAACCAGTAGTGGGTATCCCTATCACAAG  
CAGAAGAGCAAGGACTGGACGGGGAGCGCTTTTATTGGCGATCTTGGTGA  
CCAGGCCACCCACGCCAACAAAC

>pT7 : MNV\3

TTCCGGCACGGGATGGGGCTTTTGGGTAGCGGCCATGTGTTTCATCACCCG  
TAAACATGTGGCGCCACCCAAGGGCACCGAGGTGTTCCGGGCGCAAGCCCC  
AGGAATTACACCGTACCTCCAGTGGGGACTTCTGAAATACCACTTCACC  
AGTGCCGTGAGGCCTGACATTCCTGCCATGGTTCTTGAGAATGGCTGCCA  
GGAGGGCGTGTGCTCGGTCTCGTTAAGAGGGCTCTGGTGAGATGC  
TCGCCCTGGCGGTGAGGATGGGCTCGCAGGCAGCCATCAAGATCGGCAAC  
GCTGTGGTGCACGGACAGACTGGCATGCTTCTGACTGGTTCCAATGCCAA  
AGCCCAAGACCTCGGGACCATCCCGGGCGATTGTGGTTGCCCTATGTCT  
ACAAGAAAGGAAACACCTGGGTGTGATTGGGGTGCACGTGGCGGCCACT  
AGATCGGGCAACACCGTGATCGCCGCGCACTCATGGAGAGCCACCCCTTGA  
GGCTCTGGAGTTCCAGGGACCTCCCATGCTCCCTCGCCCCCTCCGGCACCT  
ATGTAGGTCTCCCCATTGCCGACTACGGTGATGCCCTCCCTGAGTACT  
AAGACCATGTTCTGGCGCACCTCGCCAGAGAAGCTCCCCCGGGGCTTG  
GGAGCCAGCTTACCTGGGCTCCAAGGATGAGAGAGTGGACGGCCCCCTCCC  
TGCAACAGGTCATGCGGGACCAGCTCAAGCCCTACTCAGAGCCGCGTGGC  
TTACTCCCCCCCCAGGAGATTTTGGATGCGGTTTGTGATGCCATCGAGAA  
CCGCTTGAGAACACCCCTTGAACCGAGAAGCCCTGGACATTTAAGAAGG  
CCTGCGAGAGTCTGGATAAAGAACCACAGCAGTGGGTATCCCTTACCATAAG  
CAAAAGAGCAGGGACTGGACAGGGACTGCCTTCATTGGTGAGCTCGGTGA  
TCAAGCCACCCATGCCAACAAAC

>307\_M5F2

TTCCGGCACGGGATGGGGCTTTTGGGTAGCGGCCATGTGTTTCATCACCCG  
TAAGCATGTGGCGCCATCCAAGGGCACCGAGGTGTTCCGGGCGCAAGCCCC  
AGGAATTACCGTACCTCCAGTGGGGACTTCTGAAATACCACTTCACC  
AGTGCCGTGAGGCCTGACATTCCTGCCATGGTTCTTGAGAATGGCTGCCA  
GGAGGGCGTGTGCTCGGTCTCGTTAAGAGGGCTCTGGTGAGATGC  
TCGCCCTGGCGGTGAGGATGGGCTCGCAGGCAGCCATCAAGATCGGCAAC  
GCTGTGGTGCACGGACAGACTGGCATGCTTCTGACTGGTTCCAATGCCAA  
AGCCCAAGACCTCGGGACCATCCCGGGCGATTGTGGTTGCCCTATGTCT

ACAAGAAAGGAAACACCTGGGTTGTGATTGGGGTGCACGTGGCGGCCACT  
AGATCGGGCAACACCGTGATCGCCGCCACTCATGGAGAGCCCACCCCTTGA  
GGCTCTGGAGTTCCAGGGACCTCCCATGCTCCCTCGCCCCCTCCGGCACCT  
ATGCAGGTCTCCCCATTGCCGACTACGGTGATGCCCCCTCCCTGAGTACT  
AAGACCATTGTTCTGGCGCACCTCGCCAGAGAAGCTCCCCCGGGGCTTG  
GGAGCCAGCTTACCTGGGCTCCAAGGATGAGAGAGTGGACGGCCCCCTCCC  
TGCAACAGGTTCATGCGGGACCAGCTCAAGCCCTACTCAGAGCCGCGTGGC  
TTACTCCCCCCCCAGGAGATTTTGGATGCGGTTTGTGATGCCATCGAGAA  
CCGCTTGAGAACACCCCTTGAACCGCAGAAGCCCTGGACATTTAAGAAGG  
CCTGCGAGAGTCTAGATAAGAACACCAGCAGTGGGTATCCTTACCATAAG  
CAAAAGAGCAAGGACTGGACAGGGGCTGCCTTCATTGGTGAGCTCGGTGA  
TCAAGCCACCCATGCCAACAAAC

>307\_M7F2

TTCCGGCACGGGATGGGGCTTTTGGGTTAGCGGCCATGTGTTTCATCACC  
TAAACATGTGGCGCCATCCAAGGGCACCGAGGTGTTTCGGGCGCAAGCCCC  
AGGAATTCACCGTACCTCCAGTGGGGACTTCTGAAATACCACTTCACC  
AGTGCCGTCAGGCCTGACATTCCTGCCATGGTTCTTGAGAAATGGCTGCCA  
GGAGGGCGTTGTTGCCTCGGTCTCGTTAAGAGGGCTCTGGTGAGATGC  
TCGCCCTGGCGGTTCAGGATGGGCTCGCAGGCAGCCATCAAGATCGGCAAC  
GCTGTGGTGCACGGACAGACTGGCATGCTTCTGACTGGTTCCAATGCCAA  
AGCCCAAGACCTCGGGACCATCCCGGGCGATTGTGGTTGCCCTATGTCT  
ACAAGAAAGGAAACACCTGGGTTGTGATTGGGGTGCACGTGGCGGCCACT  
AGATCGGGCAACACCGTGATCGCCGCCACTCATGGAGAGCCCACCCCTTGA  
GGCTCTGGAGTTCCAGGGACCTCCCATGCTCCCTCGCCCCCTCCGGCACCT  
ATGCAGGTCTCCCCATTGCCGACTACGGTGATGCCCCCTCCCTGAGTACT  
AAGACCATTGTTCTGGCGCACCTCGCCAGAGAAGCTCCCCCGGGGCTTG  
GGAGCCAGCTTACCTGGGCTCCAAGGATGAGAGAGTGGACGGCCCCCTCCC  
TGCAACAGGTTCATGCGGGACCAGCTCAAGCCCTACTCAGAGCCGCGTGGC  
TTACTCCCCCCCCAGGAGATTTTGGATGCGGTTTGTGATGCCATCGAGAA  
CCGCTTGAGAACACCCCTTGAACCGCAGAAGCCCTGGACATTTAAGAAGG  
CCTGCGAGAGTCTAGATAAGAACACCAGCAGTGGGTATCCTTACCATAAG  
CAAAAGAGCAAGGACTGGACAGGGGCTGCCTTCATTGGTGAGCTCGGTGA  
TCAAGCCACCCATGCCAACAAAC

>307\_M8F2

TTCCGGCACGGGATGGGGCTTTTGGGTTAGCGGCCATGTGTTTCATCACC  
TAAACATGTGGCGCCATCCAAGGGCACCGAGGTGTTTCGGGCGCAAGCCCC  
AGGAATTCACCGTACCTCCAGTGGGGACTTCTGAAATACCACTTCACC  
AGTGCCGTCAGGCCTGACATTCCTGCCATGGTTCTTGAGAAATGGCTGCCA  
GGAGGGCGTTGTTGCCTCGGTCTCGTTAAGAGGGCTCTGGTGAGATGC  
TCGCCCTGGCGGTTCAGGATGGGCTCGCAGGCAGCCATCAAGATCGGCAAC  
GCTGTGGTGCACGGACAGACTGGCATGCTTCTGACTGGTTCCAATGCCAA  
AGCCCAAGACCTCGGGACCATCCCGGGCGATTGTGGTTGCCCTATGTCT  
ACAAGAAAGGAAACACCTGGGTTGTGATTGGGGTGCACGTGGCGGCCACT  
AGATCGGGCAACACCGTGATCGCCGCCACTCATGGAGAGCCCACCCCTTGA  
GGCTCTGGAGTTCCAGGGACCTCCCATGCTCCCTCGCCCCCTCCGGCACCT  
ATGCAGGTCTCCCCATTGCCGACTACGGTGATGCCCCCTCCCTGAGTACT  
AAGACCATTGTTCTGGCGCACCTCGCCAGAGAAGCTCCCCCGGGGCTTG  
GGAGCCAGCTTACCTGGGCTCCAAGGATGAGAGAGTGGACGGCCCCCTCCC  
TGCAACAGGTTCATGCGGGACCAGCTCAAGCCCTACTCAGAGCCGCGTGGC  
TTACTCCCCCCCCAGGAGATTTTGGATGCGGTTTGTGATGCCATCGAGAA  
CCGCTTGAGAACACCCCTTGAACCGCAGAAGCCCTGGACATTTAAGAAGG  
CCTGCGAGAGTCTAGATAAGAACACCAGCAGTGGGTATCCTTACCATAAG  
CAAAAGAGCAAGGACTGGACAGGGGCTGCCTTCATTGGTGAGCTCGGTGA  
TCAAGCCACCCATGCCAACAAAC

>307\_CaeF2

TTCCGGCACGGGATGGGGCTTTTGGGTTAGCGGCCATGTGTTTCATCACC  
TAAACATGTGGCGCCATCCAAGGGCACCGAGGTGTTTCGGGCGCAAGCCCC  
AGGAATTCACCGTACCTCCAGTGGGGACTTCTGAAATACCACTTCACC  
AGTGCCGTCAGGCCTGACATTCCTGCCATGGTTCTTGAGAAATGGCTGCCA  
GGAGGGCGTTGTTGCCTCGGTCTCGTTAAGAGGGCTCTGGTGAGATGC  
TCGCCCTGGCGGTTCAGGATGGGCTCGCAGGCAGCCATCAAGATCGGCAAC  
GCTGTGGTGCACGGACAGACTGGCATGCTTCTGACTGGTTCCAATGCCAA  
AGCCCAAGACCTCGGGACCATCCCGGGTGATTGTGGTTGCCCTATGTCT  
ACAAGAAAGGAAACACCTGGGTTGTGATTGGGGTGCACGTGGCGGCCACT  
AGATCGGGCAACACCGTGATCGCCGCCACTCATGGAGAGCCCACYCTTGA  
GGCTCTGGAGTTCCAGGGACCTCCCATGCTCCCTCGCCCCCTCCGGCACCT  
ATGCAGGTCTCCCCATTGCCGACTACGGTGATGCCCCCTCCCTGAGTACT  
AAGACCATTGTTCTGGCGCACCTCGCCAGAGAAGCTCCCCCGGGGCTTG  
GGAGCCAGCTTACCTGGGCTCCAAGGATGAGAGAGTGGACGGCCCCCTCCC

TGCAACAGGTCATGCGGGACCAGCTCAAGCCCTACTCAGAGCCGCGTGCC  
TTACTCCCCCCCCCAGGAGATTTTGGATGCGGTTTGTGATGCCATCGAGAA  
CCGCCTTGAGAACACCCTTGAACCGCAGAAGCCCTGGACATTTAAGAAGG  
CCTGCGAGAGTCTAGATAAGAACACCAGCAGTGGGTATCCTTACCATAAG  
CAAAAGAGCAAGGACTGGACAGGGGCTGCCTTCATTGGTGAGCTCGGTGA  
TCAAGCCACCCATGCCAACAAAC

>307\_ColF2

TTTCGGCACGGGATGGGGCTTTTGGGTTAGCGGCCATGTGTTTCATCACC  
TAAACATGTGGCGCCATCCAAGGGCACCAGGTTGTTTCGGGCGCAAGCCCC  
AGGAATTCACCGTCACCTCCAGTGGGGACTTCTGAAATACCACTTCACC  
AGTGCCGTGAGGCTGACATTCCTGCCATGGTTCTTGAGAATGGCTGCCA  
GGAGGGCGTTGTTGCCTCGGTCTCGTTAAGAGGGCTCTGGTGAGATGC  
TCGCCCTGGCGGTGAGGATGGGCTCGCAGGCAGCCATCAAGATCGGCAAC  
GCTGTGGTGCACGGACAGACTGGCATGCTTCTGACTGGTTCCAATGCCAA  
AGCCCAAGACCTCGGGACCATCCCGGGTGATTGTGGTTGCCCTATGTCT  
ACAAGAAAGGAAACACCTGGGTTGTGATTGGGGTGCACGTGGCGGCCACT  
AGATCGGGCAACACCCTGATCGCCGCCACTCATGGAGAGCCACCCCTTGA  
GGCTCTGGAGTTCCAGGGACCTCCCATGCTCCCTCGCCCCCTCCGGCACCT  
ATGCAGGTCTCCCCATTGCCGACTACGGTGATGCCCTCCCTGAGTACT  
AAGACCATGTTCTGGCGCACCTCGCCAGAGAAGCTCCCCCGGGGCTTG  
GGAGCCAGCTTACCTGGGCTCCAAGGATGAGAGAGTGGACGGCCCCCTCCC  
TGCAACAGGTCATGCGGGACCAGCTCAAGCCCTACTCAGAGCCGCGTGCC  
TTACTCCCCCCCCCAGGAGATTTTGGATGCGGTTTGTGATGCCATCGAGAA  
CCGCCTTGAGAACACCCTTGAACCGCAGAAGCCCTGGACATTTAAGAAGG  
CCTGCGAGAGTCTAGATAAGAACACCAGCAGTGGGTATCCTTACCATAAG  
CAAAAGAGCAAGGACTGGACAGGGGCTGCCTTCATTGGTGAGCTCGGTGA  
TCAAGCCACCCATGCCAACAAAC

>308\_M5F2

TTTCGGCACGGGATGGGGCTTTTGGGTTAGCGGCCATGTGTTTCATCACC  
TAAACATGTGGCGCCATCCAAGGGCACCAGGTTGTTTCGGGCGCAAGCCCC  
AGGAATTCACCGTCACCTCCAGTGGGGACTTCTGAAATACCACTTCACC  
AGTGCCGTGAGGCTGACATTCCTGCCATGGTTCTTGAGAATGGCTGCCA  
GGAGGGCGTTGTTGCCTCGGTCTCGTTAAGAGGGCTCTGGTGAGATGC  
TCGCCCTGGCGGTGAGGATGGGCTCGCAGGCAGCCATCAAGATCGGCAAC  
GCTGTGGTGCACGGACAGACTGGCATGCTTCTGACTGGTTCCAATGCCAA  
AGCCCAAGACCTCGGGACCATCCCGGGCGATTGTGGTTGCCCTATGTCT  
ACAAGAAAGGAAACACCTGGGTTGTGATTGGGGTGCACGTGGCGGCCACT  
AGATCGGGCAACACCCTGATCGCCGCCACTCATGGAGAGCCACCCCTTGA  
GGCTCTGGAGTTCCAGGGACCTCCCATGCTCCCTCGCCCCCTCCGGCACCT  
ATGCAGGTCTCCCCATTGCCGACTACGGTGATGCCCTCCCTGAGTACT  
AAGACCATGTTCTGGCGCACCTCGCCAGAGAAGCTCCCCCGGGGCTTG  
GGAGCCAGCTTACCTGGGCTCCAAGGATGAGAGAGTGGACGGCCCCCTCCC  
TGCAACAGGTCATGCGGGACCAGCTCAAGCCCTACTCAGAGCCGCGTGCC  
TTACTCCCCCCCCCAGGAGATTTTGGATGCGGTTTGTGATGCCATCGAGAA  
CCGCCTTGAGAACACCCTTGAACCGCAGAAGCCCTGGACATTTAAGAAGG  
CCTGCGAGAGTCTGGATAAGAACACCAGCAGTGGGTATCCTTACCATAAG  
CAAAAGAGCAAGGACTGGACAGGGGCTGCCTTCATTGGTGAGCTCGGTGA  
TCAGGCCACCCATGCCAACAAAC

>308\_M7F2

TTTCGGCACGGGATGGGGCTTTTGGGTTAGCGGCCATGTGTTTCATCACC  
TAAACATGTGGCGCCATCCAAGGGCACCAGGTTGTTTCGGGCGCAAGCCCC  
AGGAATTCACCGTCACCTCCAGTGGGGACTTCTGAAATACCACTTCACC  
AGTGCCGTGAGGCTGACATTCCTGCCATGGTTCTTGAGAATGGCTGCCA  
GGAGGGCGTTGTTGCCTCGGTCTCGTTAAGAGGGCTCTGGTGAGATGC  
TCGCCCTGGCGGTGAGGATGGGCTCGCAGGCAGCCATCAAGATCGGCAAC  
GCTGTGGTGCACGGACAGACTGGCATGCTTCTGACTGGTTCCAATGCCAA  
AGCCCAAGACCTTGGGACCATCCCGGGCGATTGTGGTTGCCCTATGTCT  
ACAAGAAAGGAAACACCTGGGTTGTGATTGGGGTGCACGTGGCGGCCACT  
AGATCGGGCAACACCCTGATCGCCGCCACTCATGGAGAGCTACCCCTTGA  
GGCTCTGGAGTTCCAGGGACCTCCCATGCTCCCTCGCCCCCTCCGGCACCT  
ATGCAGGTCTCCCCATTGCCGACTACGGTGATGCCCTCCCTGAGTACT  
AAGACCATGTTCTGGCGCACCTCGCCAGAGAAGCTCCCCCGGGGCTTG  
GGAGCCAGCTTACCTAGGCTCCAAGGATGAGAGAGTGGACGGCCCCCTCCC  
TGCAACAGGTCATGCGGGACCAGCTCAAGCCCTACTCAGAGCCGCGTGCC  
TTACTCCCCCCCCCAGGAGATTTTGGATGCGGTTTGTGATGCCATCGAGAA  
CCGCCTTGAGAACACCCTTGAACCGCAGAAGCCCTGGACATTTAAGAAGG  
CCTGCGAGAGTCTGGATAAGAACACCAGCAGTGGGTATCCTTACCATAAG  
CAAAAGAGCAAGGACTGGACAGGGGCTGCCTTCATTGGTGAGCTCGGTGA  
TCAGGCCACCCATGCCAACAAAC

>308\_ColF2

TTTCGGCACGGGATGGGGCTTTTGGGTTAGCGGCCATGTGTTTCATCACC  
TAAACATGTGGCGCCATCCAAGGGCACCAGGTTGTTTCGGGCGCAAGCCCC  
AGGAATTCACCGTCACCTCCAGTGGGGACTTCTGAAATACCACTTCACC  
AGTGCCGTCAGGCCTGACATTCCTGCCATGGTTCTTGAGAATGGCTGCCA  
GGAGGGCGTTGTTGCCTCGGTCTCTCGTTAAGAGGGCTCTGGTGAGATGC  
TCGCCCTGGCGGTTCAGGATGGGCTCGCAGGCAGCCATCAAGATCGGCAAC  
GCTGTGGTGCACGGACAGACTGGCATGCTTCTGACTGGTTCCAATGCCAA  
AGCCCAAGACCTTGGGACCATCCCGGGCGATTGTGGTTGCCCTATGTCT  
ACAAGAAAGGAAACACCTGGGTTGTGATTGGGGTGCACGTGGCGGCCACT  
AGATCGGGCAACACCGTGATCGCCGCCACTCATGGAGAGCCTACCCCTGA  
GGCTCTGGAGTTCCAGGGACCTCCCATGCTCCCTCGCCCCCTCCGGCACCT  
ATGCAGGTCTCCCCATTGCCGACTACGGTGTGCCCCCTCCCTGAGTACT  
AAGACCATGTTCTGGCGCACCTCGCCAGAGAAGCTCCCCCGGGGCTTG  
GGAGCCAGCTTACCTAGGCTCCAAGGATGAGAGAGTGGACGGCCCCCTCCC  
TGCAACAGGTCATGCGGGACCAGCTCAAGCCCTACTCAGAGCCGCTGGC  
TTACTCCCCCCCCAGGAGATTTTGGATGCGGTTTGTGATGCCATCGAGAA  
CCGCTTGAGAACACCCCTTGAACCGCAGAAGCCCTGGACATTTAAGAAGG  
CCTGCGAGAGTCTGGATAAGAACACCAGCAGTGGGTATCCTTACCATAAG  
CAAAAGAGCAAGGACTGGACAGGGGCTGCCTTCATTGGTGAGCTCGGTGA  
TCAGGCCACCCATGCCAACAAC

>308\_MLNF2

TTTCGGCACGGGATGGGGCTTTTGGGTTAGCGGCCATGTGTTTCATCACC  
TAAACATGTGGCGCCATCCAAGGGCACCAGGTTGTTTCGGGCGCAAGCCCC  
AGGAATTCACCGTCACCTCCAGTGGGGACTTCTGAAATACYACTTCACC  
AGTGCCGTCAGGCCTGACATTCCTGCCATGGTTCTTGAGAATGGCTGCCA  
GGAGGGCGTTGTTGCCTCGGTCTCTCGTTAAGAGGGCTCTGGTGAGATGC  
TCGCCCTGGCGGTTCAGGATGGGCTCGCAGGCAGCCATCAAGATCGGCAAC  
GCTGTGGTGCACGGACAGACTGGCATGCTTCTGACTGGTTCCAATGCCAA  
AGCCCAAGACCTTGGGACCATCCCGGGCGATTGTGGTTGCCCTATGTCT  
ACAAGAAAGGAAACACCTGGGTTGTGATTGGGGTGCACGTGGCGGCCACT  
AGATCGGGCAACACCGTGATCGCCGCCACTCATGGAGAGCCTACCCCTGA  
GGCTCTGGAGTTCCAGGGACCTCCCATGCTCCCTCGCCCCCTCCGGCACCT  
ATGCAGGTCTCCCCATTGCCGACTACGGTGTGCCCCCTCCCTGAGTACT  
AAGACCATGTTCTGGCGCACCTCGCCAGAGAAGCTCCCCCGGGGCTTG  
GGAGCCAGCTTACCTAGGCTCCAAGGATGAGAGAGTGGACGGCCCCCTCCC  
TGCAACAGGTCATGCGGGACCAGCTCAAGCCCTACTCAGAGCCGCTGGC  
TTACTCCCCCCCCAGGAGATTTTGGATGCGGTTTGTGATGCCATCGAGAA  
CCGCTTGAGAACACCCCTTGAACCGCAGAAGCCCTGGACATTTAAGAAGG  
CCTGCGAGAGTCTGGATAAGAACACCAGCAGTGGGTATCCTTACCATAAG  
CAAAAGAGCARGGACTGGACAGGGGCTGCCTTCATTGGTGAGCTCGGTGA  
TCAGGCCACCCATGCCAACAAC

>309\_M7F2

TTTCGGCACGGGATGGGGCTTTTGGGTTAGCGGCCATGTGTTTCATCACC  
TAAACATGTGGCGCCATCCAAGGGCACCAGGTTGTTTCGGGCGCAAGCCCC  
AGGAATTCACCGTCACCTCCAGTGGGGACTTCTGAAATACCACTTCACC  
AGTGCCGTCAGGCCTGACATTCCTGCCATGGTTCTTGAGAATGGCTGCCA  
GGAGGGCGTTGTTGCCTCGGTCTCTCGTTAAGAGGGCTCTGGTGAGATGC  
TCGCCCTGGCGGTTCAGGATGGGCTCGCAGGCAGCCATCAAGATCGGCAAC  
GCTGTGGTGCACGGACAGACTGGCATGCTTCTGACTGGTTCCAATGCCAA  
AGCCCAAGACCTCGGGACCATCCCGGGCGATTGTGGTTGCCCTATGTCT  
ACAAGAAAGGAAACACCTGGGTTGTGATTGGGGTGCACGTGGCGGCCACT  
AGATCGGGCAACACCGTGATCGCCGCCACTCATGGAGAGCCACCCCTGA  
GGCTCTGGAGTTCCAGGGACCTCCCATGCTCCCTCGCCCCCTCCGGCACCT  
ATGCAGGTCTCCCCATTGCCGACTACGGTGTGCCCCCTCCCTGAGTACT  
AAGACCATGTTCTGGCGCACCTCGCCAGAGAAGCTCCCCCGGGGCTTG  
GGAGCCAGCTTACCTGGGCTCCAAGGATGAGAGAGTGGACGGCCCCCTCCC  
TGCAACAGGTCATGCGGGACCAGCTCAAGCCCTACTCAGAGCCGCTGGC  
TTACTCCCCCCCCAGGAGATTTTGGATGCGGTTTGTGATGCCATCGAGAA  
CCGCTTGAGAACACCCCTTGAACCGCAGAAGCCCTGGACATTTAAGAAGG  
CCTGCGAGAGTCTAGATAAGAACACCAGCAGTGGGTATCCTTACCATAAG  
CAAAAGAGCAAGGACTGGACAGGGGCTGCCTTCATTGGTGAGCTCGGTGA  
TCAAGCCACCCATGCCAACAAC

>309\_CaeF2

TTTCGGCACGGGATGGGGCTTTTGGGTTAGCGGCCATGTGTTTCATCACC  
TAAACATGTGGCGCCACCCAAGGGCACCAGGTTGTTTCGGGCGCAAGCCCC  
AGGAATTCACCGTCACCTCCAGTGGGGACTTCTGAAATACTACTTCACC  
AGTGCCGTCAGGCCTGACATTCCTGCCATGGTTCTTGAGAATGGCTGCCA  
GGAGGGCGTTGTTGCCTCGGTCTCTCGTTAAGAGGGCTCTGGTGAGATGC

TCGCCCTGGCGGTTCAGGATGGGCTCGCAGGCAGCCATCAAGATCGGCAAC  
GCTGTGGTGCACGGACAGACTGGCATGCTTCTGACTGGTTCCAATGCCAA  
AGCCAAAGACCTCGGGACCATCCCGGGCGATTGTGGTTGCCCTATGTCT  
ACAAGAAAGGGAACACCTGGGTTGTGATTGGGGTGCACGTGGCGGCCACT  
AGATCGGGCAACACCGTGATCGCCGCCACTCATGGAGAGCCACCCTTGA  
GGCTCTGGAGTTCCAGGGACCTCCCATGCTCCCTCGCCCCCTCCGGCACCT  
ATGCAGGTCTCCCCATTGCCGACTACGGTGATGCCCTCCCTGAGTACT  
AAGACCATGTTCTGGCGCACCTCGCCAGAGAAGCTCCCCCGGGGCTTG  
GGAGCCAGCTTACCTGGGCTCCAAGGATGAGAGGGTGGACGGCCCCCTCCC  
TGCAACAGGTTCATGCGGGACCAGCTCAAGCCCTACTCAGAGCCGCGTGGC  
TTACTCCCCCCCCAGGAGATTTTGGATGCGGTTTGTGATGCCATCGAGAA  
CCGCTTGTAGAACACCTTGAACCGCAGAAGCCCTGGACATTTAAGAAGG  
CCTGCGAGAGTCTGGATAAGAACACCAGCAGTGGGTATCCTTACCATAAG  
CAAAAGAGCAGGGACTGGACAGGGGCTGCCTTCATTGGTGAGCTCGGTGA  
TCAAGCCACCCATGCCAACAAC

>309\_ColF2

TTCCGCGACGGGATGGGGCTTTTGGGTTAGCGGCCATGTGTTTCATCACC  
TAAACATGTGGCGCCACCCAAGGGCACCAGGTTGTTCCGGGCGCAAGCCC  
AGGAATTCACCGTACCTCCAGTGGGGACTTCTGAAATACTACTTCACC  
AGTGCCGTCAGGCCTGACATTCCTGCCATGGTTCTTGAGAAATGGCTGCCA  
GGAGGGCGTTGTTGCCTCGGTCTCGTTAAGAGGGCTCTGGTGAGATGC  
TCGCCCTGGCGGTTCAGGATGGGCTCGCAGGCAGCCATCAAGATCGGCAAC  
GCTGTGGTGCACGGACAGACTGGCATGCTTCTGACTGGTTCCAATGCCAA  
AGCCAAAGACCTCGGGACCATCCCGGGCGATTGTGGTTGCCCTATGTCT  
ACAAGAAAGGGAACACCTGGGTTGTGATTGGGGTGCACGTGGCGGCCACT  
AGATCGGGCAACACCGTGATCGCCGCCACTCATGGAGAGCCACCCTTGA  
GGCTCTGGAGTTCCAGGGACCTCCCATGCTCCCTCGCCCCCTCCGGCACCT  
ATGCAGGTCTCCCCATTGCCGACTACGGTGATGCCCTCCCTGAGTACT  
AAGACCATGTTCTGGCGCACCTCGCCAGAGAAGCTCCCCCGGGGCTTG  
GGAGCCAGCTTACCTGGGCTCCAAGGATGAGAGGGTGGACGGCCCCCTCCC  
TGCAACAGGTTCATGCGGGACCAGCTCAAGCCCTACTCAGAGCCGCGTGGC  
TTACTCCCCCCCCAGGAGATTTTGGATGCGGTTTGTGATGCCATCGAGAA  
CCGCTTGTAGAACACCTTGAACCGCAGAAGCCCTGGACATTTAAGAAGG  
CCTGCGAGAGTCTGGATAAGAACACCAGCAGTGGGTATCCTTACCATAAG  
CAAAAGAGCAGGGACTGGACAGGGGCTGCCTTCATTGGTGAGCTCGGTGA  
TCAAGCCACCCATGCCAACAAC

>310\_M5F2

TTCCGCGACGGGATGGGGCTTTTGGGTTAGCGGCCATGTGTTTCATCACC  
TAAACATGTGGCGCCACCCAAGGGCACCAGGTTGTTCCGGGCGCAAGCCC  
AGGAATTCACCGTACCTCCAGTGGGGACTTCTGAAATACTACTTCACC  
AGTGCCGTCAGGCCTGACATTCCTGCCATGGTTCTTGAGAAATGGCTGCCA  
GGAGGGCGTTGTTGCCTCGGTCTCGTTAAGAGGGCTCTGGTGAGATGC  
TCGCCCTGGCGGTTCAGGATGGGCTCGCAGGCAGCCATCAAGATCGGCAAC  
GCTGTGGTGCACGGACAGACTGGCATGCTTCTGACTGGTTCCAATGCCAA  
AGCCAAAGACCTCGGGACCATCCCGGGCGATTGTGGTTGCCCTATGTCT  
ACAAGAAAGGGAACACCTGGGTTGTGATTGGGGTGCACGTGGCGGCCACT  
AGATCGGGCAACACCGTGATCGCCGCCACTCATGGAGAGCCACCCTTGA  
GGCTCTGGAGTTCCAGGGACCTCCCATGCTCCCTCGCCCCCTCCGGCACCT  
ATGCAGGTCTCCCCATTGCCGACTACGGTGATGCCCTCCCTGAGTACT  
AAGACCATGTTCTGGCGCACCTCGCCAGAGAAGCTCCCCCGGGGCTTG  
GGAGCCAGCTTACCTGGGCTCCAAGGATGAGAGGGTGGACGGCCCCCTCCC  
TGCAACAGGTTCATGCGGGACCAGCTCAAGCCCTACTCAGAGCCGCGTGGC  
TTACTCCCCCCCCAGGAGATTTTGGATGCGGTTTGTGATGCCATCGAGAA  
CCGCTTGTAGAACACCTTGAACCGCAGAAGCCCTGGACATTTAAGAAGG  
CCTGCGAGAGTCTGGATAAGAACACCAGCAGTGGGTATCCTTACCATAAG  
CAAAAGAGCAGGGACTGGACAGGGGCTGCCTTCATTGGTGAGCTCGGTGA  
TCAAGCCACCCATGCCAACAAC

>310\_M7F2

TTCCGCGACGGGATGGGGCTTTTGGGTTAGCGGCCATGTGTTTCATCACC  
TAAACATGTGGCGCCACCCAAGGGCACCAGGTTGTTCCGGGCGCAAGCCC  
AGGAATTCACCGTACCTCCAGTGGGGACTTCTGAAATACTACTTCACC  
AGTGCCGTCAGGCCTGACATTCCTGCCATGGTTCTTGAGAAATGGCTGCCA  
GGAGGGCGTTGTTGCCTCGGTCTCGTTAAGAGGGCTCTGGTGAGATGC  
TCGCCCTGGCGGTTCAGGATGGGCTCGCAGGCAGCCATCAAGATCGGCAAC  
GCTGTGGTGCACGGACAGACTGGCATGCTTCTGACTGGTTCCAATGCCAA  
AGCCAAAGACCTCGGGACCATCCCGGGCGATTGTGGTTGCCCTATGTCT  
ACAAGAAAGGGAACACCTGGGTTGTGATTGGGGTGCACGTGGCGGCCACT  
AGATCGGGCAACACCGTGATCGCCGCCACTCATGGAGAGCCACCCTTGA  
GGCTCTGGAGTTCCAGGGACCTCCCATGCTCCCTCGCCCCCTCCGGCACCT

ATGCAGGTCTCCCCATTGCCGACTACGGTGATGCCCTCCCCTGAGTACT  
AAGACCATGTTCTGGCGCACCTCGCCAGAGAAGCTCCCCCGGGGCTTG  
GGAGCCAGCTTACCTGGGCTCCAAGGATGAGAGGGTGGACGGCCCCCTCCC  
TGCAACAGGTCATGCGGGACCAGCTCAAGCCCTACTCAGAGCCGCTGGC  
TTACTCCCCCCCCAGGAGATTTTGGATGCGGTTTGTGATGCCATCGAGAA  
CCGCTTTGAGAACACCTTTGAACCGCAGAAGCCCTGGACATTTAAGAAGG  
CCTGCGAGAGTCTGGAYAAGAACACCAGCAGTGGGTATCCTTACCATAAG  
CAAAAGAGCAGGGACTGGACAGGGGCTGCCTTCATTGGTGAGCTCGGTGA  
TCAAGCCACCCATGCCAACAAC

>Hsu

TTTCGGCACGGGATGGGGCTTTTGGGTTAGCGGCCATGTGTTTCATCACC  
TAAACATGTGGCGCCACCCAAGGGCACCGAGGTGTTTCGGGCGCAAGCCCC  
AGGAATTCACCGTACCTCCAGTGGGGACTTCTGAAATACCACTTCACC  
AGTGCCGTACAGGCTGACATCCCTGCCATGGTTCTTGAGAAATGGCTGCCA  
GGAGGGCGTTGTTGCCTCGGTCTCGTTAAGAGGGCTCTGGTGAGATGC  
TCGCCCTGGCGGTGAGGATGGGCTCGCAGGCAGCCATCAAGATCGGCAAC  
GCTGTGGTGCACGGACAGACTGGCATGCTTCTGACTGGTTCCAATGCCAA  
AGCCCAAGACCTCGGGACCATTCGGGCGATTGTGGTTGCCCTATGTCT  
ACAAGAAAGGAAACACCTGGGTTGTGATTGGGGTGACGTGGCGGCCACT  
AGATCGGGCAACACCGTGATCGCCGCCACTCATGGGGAGCCACCCCTTGA  
GGCTCTGGAGTTCCAGGGACCTCCCATGCTTCTCGCCCCCTCCGGCACCT  
ATGCAGGTCTCCCATTGCCGACTACGGTGATGCCCTCCCCTGAGTACT  
AAGACCATGTTCTGGCGCACCTCGCCAGAGAAGCTCCCTCCCGGGGCTTG  
GGAGCCAGCTTACCTGGGCTCCAAGGATGAGAGAGTGGACGGCCCCCTCCC  
TGCAACAGGTCATGCGGGACCAGCTCAAGCCCTACTCAGAGCCGCTGGC  
TTACTCCCCCCCCAGGAGATTTTGGATGCGGTTTGTGATGCCATCGAGAA  
CCGCTTTGAGAACACCTTTGAACCGCAGAAGCCCTGGACATTTAAGAAGG  
CCTGCGAGAGTCTGGATAAGAACACCAGCAGTGGGTATCCTTACCATAAG  
CAAAAGAGCAGGGACTGGACAGGGACTGCCTTCATTGGTGAGCTCGGTGA  
TCAAGCCACCCATGCCAACAAC

>302\_M7F2

NNNGGCACGGGATGGGGCTTTTGGGTTAGCGGCCATGTGTTTCATCACC  
TAAACATGTGGCGCCACCCAAGGGCACCGAGGTGTTTCGGGCGCAAGCCCC  
AGGAATTCACCGTACCTCCAGYGGGGACTTCTGAAATACCACTTCACC  
AGTGCTGTGAGGCTGACATTCCTGCCATGGTTCTTGAGAAATGGCTGCCA  
GGAGGGTGTGTTGCTTTCGGTCTCGTCAAGAGGGCTCCGGAGAGATGC  
TCGCCCTGGCGGTGAGGATGGGTTCTCAGGCCGCCATCAAGATCGGCAAC  
GCAGTGGTGCACGGCCAGACTGGGATGCTTCTCACAGGCTCCAATGCCAA  
AGCCCAGGACCTCGGAACCATCCCCGGCGATTGCGGCTGCCCTATGTCT  
ACAAAAAGGGCAACACCTGGGTTGTGATTGGTGTGCACGTGGCGGCCACC  
AGGTCCGGGAACACGGTGATCGCTGCTACCCATGGGGAAACCCACCCCTTGA  
GGCGCTGGAGTTCCAAGGACCCCCATGCTCCCTCGTCCCTCTGGCACCT  
ATGTAGGCCTCCCCATTGCAGACTATGGTGATGCCCTCCCCTCAGCACC  
AAGACCATGTTCTGGCGCACTTCTCCAGAGAAGCTGCCGCTGGGGCATG  
GGAGCCCCTTACCTGGGTTCCAAGGATGAGAGGGTGGACGGTCCCTCCC  
TCCAGCAGGTTATGCGAGACCAGCTCAAGCCCTACTCCGAGCCTCGTGGA  
TTACTCCCCCGCAGGAGATTTTGGACGAGTTTGTGATGCCATCGAGAA  
CCGACTTGAGAATACGCTGGAGCCCCAGAAGCCCTGGACATTTAAGAAAG  
CCTGCGAGAGCCTTGATAAGAACACTAGCAGTGGCTATCCCTACCACAAA  
CAGAAGAGTAGGGACTGGACGGGCACCGCCTTCATTGGTGAGCTCGGTGA  
TCAAGCCACCCATGCCAACAAC

>302\_Co1F2

TTTCGGCACGGGATGGGGCTTTTGGGTTAGCGGCCATGTGTTTCATCACC  
TAAACATGTGGCGCCACCCAAGGGCACCGAGGTGTTTCGGGCGCAAGCCCC  
AGGAATTCACCGTACCTCCAGTGGGGACTTCTGAAATACCACTTCACC  
AGTGCTGTGAGGCTGACATTCCTGCCATGGTTCTTGAGAAATGGCTGCCA  
GGAGGGTATTGTTGCTTTCGGTCTCGTCAAGAGGGCTCCGGAGAGATGC  
TCGCCCTGGCGGTGAGGATGGGTTCCCAGGCCGCCATCAAGATCGGCAAC  
GCAGTGGTGCACGGCCAGACTGGGATGCTTCTCACAGGCTCCAATGCCAA  
AGCCCAGGACCTCGGAACCATCCCCGGCGATTGCGGCTGCCCTATGTCT  
ACAAAAAGGGCAACACCTGGGTTGTGATTGGTGTGCACGTGGCGGCCACC  
AGGTCCGGGAACACGGTGATCGCTGCTACCCATGGGGAAACCCACCCCTTGA  
GGCGCTGGAGTTCCAAGGACCCCCATGCTCCCTCGTCCCTCTGGCACCT  
ATGTAGGCCTCCCCATTGCAGACTATGGTGATGCCCTCCCCTCAGCACC  
AAGACCATGTTCTGGCGCACTTCTCCAGAGAAGCTGCCGCTGGGGCATG  
GGAGCCCCTTACCTGGGTTCCAAGGATGAGAGGGTGGACGGTCCCTCCC  
TCCAGCAGGTTATGCGAGACCAGCTCAAGCCCTACTCCGAGCCTCGTGGA  
CTACTCCCCCGCAGGAGATTTTGGATGAGTTTGTGATGCCATCGAGAA  
CCGACTTGAGAATACGCTGGAGCCCCAGAAGCCCTGGACATTTAAGAAAG

CCTGCGAGAGCCTTGATAAGAACAACACTAGCAGTGGCTATCCCTACCACAAA  
CAGAAGAGTAGGGACTGGACGGGCACCGCCTTCATTGGTGAGCTCGGTGA  
TCAAGCCACCCATGCCAACAAC

>302\_MLF2

TTCCGGCACGGGATGGGGCTTTTGGGTTAGCGGCCATGTGTTTCATCACC  
TAAACATGTGGCGCCACCCAAGGGCACCAGGTTGTTTCGGGCGCAAGCCCC  
AGGAATTCACCGTACCTCCAGTGGGGACTTCTGAAATACCACTTCACC  
AGTGCTGTGAGGCCTGACATTCTGCCATGGTTCTTGAGAATGGCTGCCA  
GGAGGGTGTGTTGCTTTCGGTCTCGTCAAGAGGGCTCCGGAGAGATGC  
TCGCCCTGGCGGTGAGGATGGGTTCTCAGGCCGCCATCAAGATCGGCAAC  
GCAGTGGTGCACGGCCAGACTGGGATGCTTCTCACAGGCTCCAATGCCAA  
AGCCCAGGACCTCGGAACCATCCCCGGCGATTGCGGCTGCCCTATGTCT  
ACAAAAAGGGCAACACCTGGGTTGTGATTGGTGTGCACGTGGCGGCCACC  
AGGTCCGGGAACACGGTGTATCGCTGCTACCCATGGGGAAACCCACCTTGA  
GGCGCTGGAGTTCCAAGGACCCCCATGCTCCCTCGTCCCTCTGGCACCT  
ATGTAGGCCTCCCATTCAGACTATGGTGTGATGCCCCCTCCCTCAGCACC  
AAGACCATGTTCTGGCGCACTTCTCCAGAGAAGCTGCCGCTGGGGCATG  
GGAGCCCCTTACCTGGGTTCCAAGGATGAGAGGGTGGACGGTCCCTCCC  
TCCAGCAGGTTATGCGAGACCAGCTCAAGCCCTACTCCGAGCCTCGTGGA  
CTACTCCCCCGCAGGAGATTTTGGATGCAGTTTGTGATGCCATCGAGAA  
CCGACTTGAGAATACGCTGGAGCCCCAGAAGCCCTGGACCTTTAAGAAA  
CCTGCGAGAGCCTTGATAAGAACAACACTAGCAGTGGCTATCCCTACCACAAA  
CAGAAGAGTAGGGACTGGACGGGCACCGCCTTCATTGGTGAGCTCGGTGA  
TCAAGCCACCCATGCCAACAAC

>303\_M7F2

TTCCGGCACGGGATGGGGCTTTTGGGTTAGCGGCCATGTGTTTCATCACC  
TAAACATGTGGCGCCACCCAAGGGCACCAGGTTGTTTCGGGCGCAAGCCCC  
AGGAATTCACCGTACCTCCAGTGGGGACTTCTGAAATACCACTTCACC  
AGTGCTGTGAGGCCTGACATTCTGCCATGGTTCTTGAGAATGGCTGCCA  
GGAGGGTGTGTTGCTTTCGGTCTCGTCAAGAGGGCTCCGGAGAGATGC  
TCGCCCTGGCGGTGAGGATGGGTTCTCAGGCCGCCATCAAGATCGGCAAC  
GCAGTGGTGCACGGCCAGACTGGGATGCTTCTCACAGGCTCCAATGCCAA  
AGCCCAGGACCTCGGAACCATCCCCGGCGATTGCGGCTGCCCTATGTCT  
ACAAAAAGGGCAACACCTGGGTTGTGATTGGTGTGCACGTGGCGGCCACC  
AGGTCCGGGAACACGGTGTATCGCTGCTACCCATGGGGAAACCCACCTTGA  
GGCGCTGGAGTTCCAAGGACCCCCATGCTCCCTCGTCCCTCTGGCACCT  
ATGTAGGCCTCCCATTCAGACTATGGTGTGATGCCCCCTCCCTCAGCACC  
AAGACCATGTTCTGGCGCACTTCTCCAGAGAAGCTGCCGCTGGGGCATG  
GGAGCCCCTTACCTGGGTTCCAAGGATGAGAGGGTGGATGGTCCCTCCC  
TCCAGCAGGTTATGCGAGACCAGCTCAAGCCCTACTCCGAGCCTCGTGGA  
YTACTCCCCCGCAGGAGATTTTGGACGCAGTTTGTGATGCCATCGAGAA  
CCGACTTGAGAATACGCTGGAGCCCCAGAAGCCCTGGACCTTTAAGAAA  
CCTGCGAGAGCCTTGATAAGAACAACACTAGCAGTGGCTATCCCTACCACAAA  
CAGAAGAGTAGGGACTGGACGGGCACCGCCTTCATTGGTGAGCTCGGTGA  
TCAAGCCACCCATGCCAACAAC

>303\_M8F2

TTCCGGCACGGGATGGGGCTTTTGGGTTAGCGGCCATGTGTTTCATCACC  
TAAACATGTGGCGCCACCCAAGGGCACCAGGTTGTTTCGGGCGCAAGCCCC  
AGGAATTCACCGTACCTCCAGTGGGGACTTCTGAAATACCACTTCACC  
AGTGCTGTGAGGCCTGACATTCTGCCATGGTTCTTGAGAATGGCTGCCA  
GGAGGGTGTGTTGCTTTCGGTCTCGTCAAGAGGGCTCCGGAGAGATGC  
TCGCCCTGGCGGTGAGGATGGGTTCTCAGGCCGCCATCAAGATCGGCAAC  
GCAGTGGTGCACGGCCAGACTGGGATGCTTCTCACAGGCTCCAATGCCAA  
AGCCCAGGACCTCGGAACCATCCCCGGCGATTGCGGCTGCCCTATGTCT  
ACAAAAAGGGCAACACCTGGGTTGTGATTGGTGTGCACGTGGCGGCCACC  
AGGTCCGGGAACACGGTGTATCGCTGCTACCCATGGGGAAACCCACCTTGA  
GGCGCTGGAGTTCCAAGGACCCCCATGCTCCCTCGTCCCTCTGGCACCT  
ATGTAGGCCTCCCATTCAGAYTATGGTGTGATGCCCCCTCCCTCAGCACC  
AAGACCATGTTCTGGCGCACTTCTCCAGAGAAGCTGCCGCTGGGGCATG  
GGAGCCCCTTACCTGGGTTCCAAGGATGAGAGGGTGGACGGTCCCTCCC  
TCCAGCAGGTTATGCGAGACCAGCTCAAGCCCTACTCCGAGCCTCGTGGA  
CTACTCCCCCGCAGGAGATTTTGGATGCAGTTTGTGATGCCATCGAGAA  
CCGACTTGAGAATACGCTGGAGCCCCAGAAGCCCTGGACCTTTAAGAAA  
CCTGCGAGAGCCTTGATAAGAACAACACTAGCAGTGGCTATCCCTACCACAAA  
CAGAAGAGTAGGGACTGGACGGGCACCGCCTTCATTGGTGAGCTCGGTGA  
TCAAGCCACCCATGCCAACAAC

>303\_CaeF2

TTCCGGCACGGGATGGGGCTTTTGGGTTAGCGGCCATGTGTTTCATCACC  
TAAACATGTGGCGCCACCCAAGGGCACCAGGTTGTTTCGGGCGCAAGCCCC

AGGAATTCACCGTCACCTCCAGTGGGGACTTCTGAAATACCACTTCACC  
AGTGCTGTGAGGCCTGACATTCTGCCATGGTTCTTGAGAATGGCTGCCA  
GGAGGGTGTGTGTTGCTTCGGTCTCGTCAAGAGGGCTCCGGAGAGATGC  
TCGCCCTGGCGGTGAGGATGGGTCTCAGGCCGCCATCAAGATCGGCAAC  
GCAGTGGTGCACGGCCAGACTGGGATGCTTCTCACAGGCTCCAATGCCAA  
AGCCCAGGACCTCGGAACCATCCCCGGCGATTGCGGCTGCCCTATGTCT  
ACAAAAAGGGCAACACCTGGGTGTGATTGGTGTGCACGTGGCGGCCACC  
AGGTGGGGGAACACGGTGATCGCTGCTACCCATGGGGAAACCCACCTTGA  
GGCGCTGGAGTTCCAAGGACCCCCATGCTCCCTCGTCCCTCTGGCACCT  
ATGTAGGCCTCCCCATTGCAGACTATGGTGATGCCCCCTCCCTCAGCACC  
AAGACCATGTTCTGGCGCACTTCTCCAGAGAAGCTGCCGCTGGGGCATG  
GGAGCCCCTTACCTGGGTCCAAGGATGAGAGGGTGGATGGTCCCTCCC  
TCCAGCAGGTTATGCGAGACCAGCTCAAGCCCTACTCCGAGCCTCGTGGA  
YTAATCCCCCGCAGGAGATTTTGGACGCAGTTTGTGATGCCATCGAGAA  
CCGACTTGAGAATACGCTGGAGCCCCAGAAGCCCTGGACCTTTAAGAAA  
CCTGCGAGAGCCTTGATAAAGAACAAGACTAGCAGTGGCTATCCCTACCACAA  
CAGAAGAGTAGGGACTGGACGGGCACCGCCTTCATTGGTGAGCTCGGTGA  
TCAAGCCACCCATGCCAACAAC

>303\_ColF2

TTCCGGCACGGGATGGGGCTTTTGGGTAGCGGCCATGTGTTTCATCACC  
TAAACATGTGGCGCCACCCAAGGGCACCAGGTTGTTCCGGCGCAAGCCCC  
AGGAATTCACCGTCACCTCCAGTGGGGACTTCTGAAATACCACTTCACC  
AGTGCTGTGAGGCCTGACATTCTGCCATGGTTCTTGAGAATGGCTGCCA  
GGAGGGTGTGTGTTGCTTCGGTCTCGTCAAGAGGGCTCCGGAGAGATGC  
TCGCCCTGGCGGTGAGGATGGGTCTCAGGCCGCCATCAAGATCGGCAAC  
GCAGTGGTGCACGGCCAGACTGGGATGCTTCTCACAGGCTCCAATGCCAA  
AGCCCAGGACCTCGGAACCATCCCCGGCGATTGCGGCTGCCCTATGTCT  
ACAAAAAGGGCAACACCTGGGTGTGATTGGTGTGCACGTGGCGGCCACC  
AGGTGGGGGAACACGGTGATCGCTGCTACCCATGGGGAAACCCACCTTGA  
GGCGCTGGAGTTCCAAGGACCCCCATGCTCCCTCGTCCCTCTGGCACCT  
ATGTAGGCCTCCCCATTGCAGACTATGGTGATGCCCCCTCCCTCAGCACC  
AAGACCATGTTCTGGCGCACTTCTCCAGAGAAGCTGCCGCTGGGGCATG  
GGAGCCCCTTACCTGGGTCCAAGGATGAGAGGGTGGACGGTCCCTCCC  
TCCAGCAGGTTATGCGAGACCAGCTCAAGCCCTACTCCGAGCCTCGTGGA  
TTACTCCCCCGCAGGAGATTTTGGACGCAGTTTGTGATGCCATCGAGAA  
CCGACTTGAGAATACGCTGGAGCCCCAGAAGCCCTGGACCTTTAAGAAA  
CCTGCGAGAGCCTTGATAAAGAACAAGACTAGCAGTGGCTATCCCTACCACAA  
CAGAAGAGTAGGGACTGGACGGGCACCGCCTTCATTGGTGAGCTCGGTGA  
TCAAGCCACCCATGCCAACAAC

>303\_MLF2

TTCCGGCACGGGATGGGGCTTTTGGGTAGCGGCCATGTGTTTCATCACC  
TAAACATGTGGCGCCACCCAAGGGCACCAGGTTGTTCCGGCGCAAGCCCC  
AGGAATTCACCGTCACCTCCAGTGGGGACTTCTGAAATACCACTTCACC  
AGTGCTGTGAGGCCTGACATTCTGCCATGGTTCTTGAGAATGGCTGCCA  
GGAGGGTGTGTGTTGCTTCGGTCTCGTCAAGAGGGCTCCGGAGAGATGC  
TCGCCCTGGCGGTGAGGATGGGTCTCAGGCCGCCATCAAGATCGGCAAC  
GCAGTGGTGCACGGCCAGACTGGGATGCTTCTCACAGGCTCCAATGCCAA  
AGCCCAGGACCTCGGAACCATCCCCGGCGATTGCGGCTGCCCTATGTCT  
ACAAAAAGGGCAACACCTGGGTGTGATTGGTGTGCACGTGGCGGCCACC  
AGGTGGGGGAACACGGTGATCGCTGCTACCCATGGGGAAACCCACCTTGA  
GGCGCTGGAGTTCCAAGGACCCCCATGCTCCCTCGTCCCTCTGGCACCT  
ATGTAGGCCTCCCCATTGCAGACTATGGTGATGCCCCCTCCCTCAGCACC  
AAGACCATGTTCTGGCGCACTTCTCCAGAGAAGCTGCCGCTGGGGCATG  
GGAGCCCCTTACCTGGGTCCAAGGATGAGAGGGTGGACGGTCCCTCCC  
TCCAGCAGGTTATGCGAGACCAGCTCAAGCCCTACTCCGAGCCTCGTGGA  
TTACTCCCCCGCAGGAGATTTTGGACGCAGTTTGTGATGCCATCGAGAA  
CCGACTTGAGAATACGCTGGAGCCCCAGAAGCCCTGGACCTTTAAGAAA  
CCTGCGAGAGCCTTGATAAAGAACAAGACTAGCAGTGGCTATCCCTACCACAA  
CAGAAGAGTAGGGACTGGACGGGCACCGCCTTCATTGGTGAGCTCGGTGA  
TCAAGCCACCCATGCCAACAAC

>304\_M7F2

TTCCGGCACGGGATGGGGCTTTTGGGTAGCGGCCATGTGTTTCATCACC  
TAAACATGTGGCGCCACCCAAGGGCACCAGGTTGTTCCGGCGCAAGCCCC  
AGGAATTCACCGTCACCTCCAGTGGGGACTTCTGAAATACCACTTCACC  
AGTGCTGTGAGGCCTGACATTCTGCCATGGTTCTTGAGAATGGCTGCCA  
GGAGGGTGTGTGTTGCTTCGGTCTCGTCAAGAGGGCTCCGGAGAGATGC  
TCGCCCTGGCGGTGAGGATGGGTCTCAGGCCGCCATCAAGATCGGCAAC  
GCAGTGGTGCACGGCCAGACTGGGATGCTTCTCACAGGCTCCAATGCCAA  
AGCCCAGGACCTCGGAACCATCCCCGGCGATTGCGGCTGCCCTATGTCT



ACAAAAAGGGCAACACCTGGGTTGTGATTGGTGTGCACGTGGCGGCCACC  
AGGTGGGGGAACACGGTGTATCGCTGCTACCCATGGGGAAACCCACCCCTTGA  
GGCGCTGGAGTTCCAAGGACCCCCATGCTCCCTCGTCCCTCTGGCACCT  
ATGTAGGCCTCCCCATTGCAGACTATGGTGTATGCCCCCTCCCTCAGCACC  
AAGACCATGTTCTGGCGCACTTCTCCAGAGAAGCTGCCCGCTGGGGCATG  
GGAGCCCCTTACCTGGGTTCCAAGGATGAGAGGGTGGACGGTCCCTCCC  
TCCAGCAGGTTATGCGAGACCAGCTCAAGCCCTACTCCGAGCCTCGTGGA  
CTACTCCCCCGCAGGAGATTTTGGATGCAGTTTGTGATGCCATCGAGAA  
CCGACTTGAGAATACGCTGGAGCCCCAGAAGCCCTGGACCTTTAAGAAAAG  
CCTGCGAGAGCCTTGATAAGAACAACACTAGCAGTGGCTATCCCTACCACAAA  
CAGAAGAGTAGGGACTGGACGGGCACCGCCTTCATTGGTGAGCTCGGTGA  
TCAAGCCACCCATGCCAACAAAC

>304\_CaeF2

TTCCGGCACGGGATGGGGCTTTTGGGTTAGCGGCCATGTGTTTCATCACC  
TAAACATGTGGCGCCACCCAAGGGCACCAGGTTGTTTCGGGCGCAAGCCCC  
AGGAATTCACCGTCACTCCAGTGGGGACTTCTGAAATACCACTTCACC  
AGTGCTGTGAGGCCTGACATTCCTGCCATGGTTCTTGAGAATGGCTGCCA  
GGAGGGTATTGTTGCTTCGGTCCCTCGTCAAGAGGGCTCCGGAGAGATGC  
TCGCCCTGGCGGTGAGGATGGGTTCTCAGGCCGCCATCAAGATCGGCAAC  
GCAGTGGTGCACGGCCAGACTGGGATGCTTCTCACAGGCTCCAATGCCAA  
AGCCCAGGACCTCGGAACCATCCCCGGCGATTGCGGCTGCCCTATGTCT  
ACAAAAAGGGCAACACCTGGGTTGTGATTGGTGTGCACGTGGCGGCCACC  
AGGTGGGGGAACACGGTGTATCGCTGCTACCCATGGGGAAACCCACCCCTTGA  
GGCGCTGGAGTTCCAAGGACCCCCATGCTCCCTCGTCCCTCTGGCACCT  
ATGTAGGCCTCCCCATTGCAGACTATGGTGTATGCCCCCTCCCTCAGCACC  
AAGACCATGTTCTGGCGCACTTCTCCAGAGAAGCTGCCCGCTGGGGCATG  
GGAGCCCCTTACCTGGGTTCCAAGGATGAGAGGGTGGACGGTCCCTCCC  
TCCAGCAGGTTATGCGAGAYCAGCTCAAGCCCTACTCCGAGCCTCGTGGA  
CTACTCCCCCGCAGGAGATTTTGGATGCAGTTTGTGATGCCATCGAGAA  
CCGACTTGAGAATACGCTGGAGCCCCAGAAGCCCTGGACCTTTAAGAAAAG  
CCTGCGAGAGCCTTGATAAGAACAACACTAGCAGTGGCTATCCCTACCACAAA  
CAGAAGAGTAGGGACTGGACGGGCACCGCCTTCATTGGTGAGCTCGGTGA  
TCAAGCCACCCATGCCAACAAAC

>305\_M7F2

TTCCGGCACGGGATGGGGCTTTTGGGTTAGCGGCCATGTGTTTCATCACC  
TAAACATGTGGCGCCACCCAAGGGCACCAGGTTGTTTCGGGCGCAAGCCCC  
AGGAATTCACCGTCACTCCAGTGGGGACTTCTGAAATACCACTTCACC  
AGTGCTGTGAGGCCTGACATTCCTGCCATGGTTCTTGAGAATGGCTGCCA  
GGAGGGTATTGTTGCTTCGGTCCCTCGTCAAGAGGGCTCCGGAGAGATGC  
TCGCCCTGGCGGTGAGGATGGGTTCTCAGGCCGCCATCAAGATCGGCAAC  
GCAGTGGTGCACGGCCAGACTGGGATGCTTCTCACAGGCTCCAATGCCAA  
AGCCCAGGACCTCGGAACCATCCCCGGCGATTGCGGCTGCCCTATGTCT  
ACAAAAAGGGCAACACCTGGGTTGTGATTGGTGTGCACGTGGCRGCCACC  
AGGTGGGGGAACACGGTGTATCGCTGCTACCCATGGGGAAACCCACCCCTTGA  
GGCGCTGGAGTTCCAAGGACCCCCATGCTCCCTCGTCCCTCTGGCACCT  
ATGTAGGCCTCCCCATTGCAGACTATGGTGTATGCCCCCTCCCTCAGCACC  
AAGACCATGTTCTGGCGCACTTCTCCAGAGAAGCTGCCCGCTGGGGCATG  
GGAGCCCCTTACCTGGGTTCCAAGGATGAGAGGGTGGACGGTCCCTCCC  
TCCAGCAGGTTATGCGAGACCAGCTCAAGCCCTACTCCGAGCCTCGTGGA  
CTACTCCCCCGCAGGAGATTTTGGACGCAGTTTGTGATGCCATCGAGAA  
CCGACTTGAGAATACGCTGGAGCCCCAGAAGCCCTGGACCTTTAAGAAAAG  
CCTGCGAGAGCCTTGATAAGAACAACACTAGCAGTGGCTATCCCTACCACAAA  
CAGAAGAGTAGGGACTGGACGGGCACCGCCTTCATTGGTGAGCTCGGTGA  
TCAAGCCACCCATGCCAACAAAC

>305\_Co1F2

TTCCGGCACGGGATGGGGCTTTTGGGTTAGCGGCCATGTGTTTCATCACC  
TAAACATGTGGCGCCACCCAAGGGCACCAGGTTGTTTCGGGCGCAAGCCCC  
AGGAATTCACCGTCACTCCAGTGGGGACTTCTGAAATACCACTTCACC  
AGTGCTGTGAGGCCTGACATTCCTGCCATGGTTCTTGAGAATGGCTGCCA  
GGAGGGTATTGTTGCTTCGGTCCCTCGTCAAGAGGGCTCCGGAGAGATGC  
TCGCCCTGGCGGTGAGGATGGGTTCTCAGGCCGCCATCAAGATCGGCAAC  
GCAGTGGTGCACGGCCAGACTGGGATGCTTCTCACAGGCTCCAATGCCAA  
AGCTCAGGACCTCGGAACCATCCCCGGCGATTGCGGCTGCCCTATGTCT  
ACAAAAAGGGCAACACCTGGGTTGTGATTGGTGTGCACGTGGCRGCCACC  
AGGTGGGGGAACACGGTGTATCGCTGCTACCCATGGGGAAACCCACCCCTTGA  
GGCGCTGGAGTTCCAAGGACCCCCATGCTCCCTCGTCCCTCTGGCACCT  
ATGTAGGCCTCCCCATTGCAGACTATGGTGTATGCCCCCTCCCTCAGCACC  
AAGACCATGTTCTGGCGCACTTCTCCAGAGAAGCTGCCCGCTGGGGCATG  
GGAGCCCCTTACCTGGGTTCCAAGGATGAGAGGGTGGACGGTCCCTCCC

TCCAGCAGGTTATGCGAGACCAGCTCAAGCCCTACTCCGAGCCTCGTGGA  
CTACTCCCCCGCAGGAGATTTTGGACGCAGTTTGTGATGCCATTGAGAA  
CCGACTTGAGAATACGCTGGAGCCCCAGAAGCCCTGGACCTTTAAGAAA  
CCTGCGAGAGCTTTGATAAGAACAACACTAGCAGTGGCTATCCCTACCACAA  
CAGAAGAGTAGGGACTGGACGGGCACCGCCTTCATTGGTGAGCTCGGTGA  
TCAAGCCACCCATGCCAACAAAC

>306\_M5F2

TTTCGGCACGGGATGGGGCTTTTGGGTTAGCGGCCATGTGTTTCATCACC  
TAAACATGTGGCGCCACCCAAGGGCACCAGGTTGTTTCGGGCGCAAGCCCC  
AGGAATTCACCGTCACCTCCAGYGGGACTTCTGAAATACCACTTCACC  
AGTGCTGTGAGGCCTGACATTCCTGCCATGGTTCTTGAGAATGGCTGCCA  
GGAGGGTGTGTTGCTTCGGTCTCTCGTCAAGAGGGCTCCGGAGAGATGC  
TCGCCCTGGCGGTGAGGATGGGTTCTCAGGCCGCCATCAAGATCGGCAAC  
GCAGTGGTGCACGGCCAGACTGGGATGCTTCTCACAGGCTCCAATGCCAA  
AGCCCAGGACCTCGGAACCATCCCCGGCGATTGCGGCTGCCCTATGTCT  
ACAAAAGGGCAACACCTGGGTTGTGATTGGTGTGCACGTGGCGGCCACC  
AGGTTCGGGGAACACGGTGTGCTGCTACCCATGGGGAACCCACCCCTTGA  
GGCGCTGGAGTTCCAAGGACCCCCATGCTCCCTCGTCCCTCTGGCACCT  
ATGTAGGCCTCCCCATTGCAGACTATGGTGTGATGCCCTCCCTCAGCACC  
AAGACCATGTTCTGGCGCACTTCTCCAGAGAAGCTGCCGCCCTGGGGCATG  
GGAGCCCCGTTACCTGGGTTCCAAGGATGAGAGGGTGGACGGTCCCTCCC  
TCCAGCAGGTTATGCGAGACCAGCTCAAGCCCTACTCCGAGCCTCGTGGA  
YTAATCCCCCGCAGGAGATTTTGGACGCAGTTTGTGATGCCATCGAGAA  
CCGACTTGAGAATACGCTGGAGCCCCAGAAGCCCTGGACCTTTAAGAAA  
CCTGCGAGAGCCTTGATAAGAACAACACTAGCAGTGGCTATCCCTACCACAA  
CAGAAGAGTAGGGACTGGACGGGCACCGCCTTCATTGGTGAGCTCGGTGA  
TCAAGCCACCCATGCCAACAAAC

>306\_M7F2

TTTCGGCACGGGATGGGGCTTTTGGGTTAGCGGCCATGTGTTTCATCACC  
TAAACATGTGGCGCCACCCAAGGGCACCAGGTTGTTTCGGGCGCAAGCCCC  
AGGAATTCACCGTCACCTCCAGTGGGACTTCTGAAATACCACTTCACC  
AGTGCTGTGAGGCCTGACATTCCTGCCATGGTTCTTGAGAATGGCTGCCA  
GGAGGGTGTGTTGCTTCGGTCTCTCGTCAAGAGGGCTCCGGAGAGATGC  
TCGCCCTGGCGGTGAGGATGGGTTCTCAGGCCGCCATCAAGATCGGCAAC  
GCAGTGGTGCACGGCCAGACTGGGATGCTTCTCACAGGCTCCAATGCCAA  
AGCCCAGGACCTCGGAACCATCCCCGGCGATTGCGGCTGCCCTATGTCT  
ACAAAAGGGCAACACCTGGGTTGTGATTGGTGTGCACGTGGCGGCCACC  
AGGTTCGGGGAACACGGTGTGCTGCTACCCATGGGGAACCCACCCCTTGA  
GGCGCTGGAGTTCCAAGGACCCCCATGCTCCCTCGTCCCTCTGGCACCT  
ATGTAGGCCTCCCCATTGCAGACTATGGTGTGATGCCCTCCCTCAGCACC  
AAGACCATGTTCTGGCGCACTTCTCCAGAGAAGCTGCCGCCCTGGGGCATG  
GGAGCCCCGTTACCTGGGTTCCAAGGATGAGAGGGTGGACGGTCCCTCCC  
TCCAGCAGGTTATGCGAGACCAGCTCAAGCCCTACTCCGAGCCTCGTGGA  
CTACTCCCCCGCAGGAGATTTTGGATGCAGTTTGTGATGCCATCGAGAA  
CCGACTTGAGAATACGCTGGAGCCCCAGAAGCCCTGGACCTTTAAGAAA  
CCTGCGAGAGCCTTGATAAGAACAACACTAGCAGTGGCTATCCCTACCACAA  
CAGAAGAGTAGGGACTGGACGGGCACCGCCTTCATTGGTGAGCTCGGTGA  
TCAAGCCACCCATGCCAACAAAC

>306\_M8F2

TTTCGGCACGGGATGGGGCTTTTGGGTTAGCGGCCATGTGTTTCATCACC  
TAAACATGTGGCGCCACCCAAGGGCACCAGGTTGTTTCGGGCGCAAGCCCC  
AGGAATTCACCGTCACCTCCAGTGGGACTTCTGAAATACCACTTCACC  
AGTGCTGTGAGGCCTGACATTCCTGCCATGGTTCTTGAGAATGGCTGCCA  
GGAGGGTGTGTTGCTTCGGTCTCTCGTCAAGAGGGCTCCGGAGAGATGC  
TCGCCCTGGCGGTGAGGATGGGTTCTCAGGCCGCCATCAAGATCGGCAAC  
GCAGTGGTGCACGGCCAGACTGGGATGCTTCTCACAGGCTCCAATGCCAA  
AGCCCAGGACCTCGGAACCATCCCCGGCGATTGCGGCTGCCCTATGTCT  
ACAAAAGGGCAACACCTGGGTTGTGATTGGTGTGCACGTGGCGGCCACC  
AGGTTCGGGGAACACGGTGTGCTGCTACCCATGGGGAACCCACCCCTTGA  
GGCGCTGGAGTTCCAAGGACCCCCATGCTCCCTCGTCCCTCTGGCACCT  
ATGTAGGCCTCCCCATTGCAGACTATGGTGTGATGCCCTCCCTCAGCACC  
AAGACCATGTTCTGGCGCACTTCTCCAGAGAAGCTGCCGCCCTGGGGCATG  
GGAGCCCCGTTACCTGGGTTCCAAGGATGAGAGGGTGGACGGTCCCTCCC  
TCCAGCAGGTTATGCGAGACCAGCTCAAGCCCTACTCCGAGCCTCGTGGA  
CTACTCCCCCGCAGGAGATTTTGGATGCAGTTTGTGATGCCATCGAGAA  
CCGACTTGAGAATACGCTGGAGCCCCAGAAGCCCTGGACCTTTAAGAAA  
CCTGCGAGAGCCTTGATAAGAACAACACTAGCAGTGGCTATCCCTACCACAA  
CAGAAGAGTAGGGACTGGACGGGCACCGCCTTCATTGGTGAGCTCGGTGA  
TCAAGCCACCCATGCCAACAAAC

>306\_CaeF2

TTTCGGCACGGGATGGGGCTTTTGGGTTAGCGGCCATGTGTTTCATCACC  
TAAACATGTGGCGCCACCCAAGGGCACCGAGGTGTTTCGGGCGCAAGCCCC  
AGGAATTCACCGTCACCTCCAGTGGGGACTTCTTCAAATACCACTTCACC  
AGTGCTGTGAGGCCTGACATTCCTGCCATGGTTCTTGAGAATGGCTGCCA  
GGAGGGTGTGTTGCTTTCGGTCTCTCGTCAAGAGGGCTCCGGAGAGATGC  
TCGCCCTGGCGGTGAGGATGGGTTCTCAGGCCGCCATCAAGATCGGCAAC  
GCAGTGGTGCACGGCCAGACTGGGATGCTTCTCACAGGCTCCAATGCCAA  
AGCCCAGGACCTCGGAACCATCCCCGGCGATTGCGGCTGCCCTATGTCT  
ACAAAAGGGCAACACCTGGGTTGTGATTGGTGTGCACGTGGCGGCCACC  
AGGTCGGGGAACACGGTGATCGCTGCTACCCATGGGGAACCCACCCCTGA  
GGCGCTGGAGTTCCAAGGACCCCCATGCTCCCTCGTCCCTCTGGCACCT  
ATGTAGGCCTCCCCATTGCAGACTATGGTGTGATGCCCCCTCCCTCAGCACC  
AAGACCATGTTCTGGCGCACTTCTCCAGAGAAGCTGCCGCCCTGGGGCATG  
GGAGCCCCTTACCTGGGTTCCAAGGATGAGAGGGTGGACGGTCCCTCCC  
TCCAGCAGGTTATGCGAGACCAGCTCAAGCCCTACTCCGAGCCTCGTGGA  
CTACTCCCCCGCAGGAGATTTTGGATGCAGTTTGTGATGCCATCGAGAA  
CCGACTTGAGAATACGCTGGAGCCCCAGAAGCCCTGGACCTTTAAGAAAG  
CCTGCGAGAGCCTTGATAAAGAACAACACTAGCAGTGGCTATCCCTACCACAA  
CAGAAGAGTAGGGACTGGACGGGCACCGCCTTCATTGGTGAGCTCGGTGA  
TCAAGCCACCCATGCCAACAAC

>306\_ColF2

TTTCGGCACGGGATGGGGCTTTTGGGTTAGCGGCCATGTGTTTCATCACC  
TAAACATGTGGCGCCACCCAAGGGCACCGAGGTGTTTCGGGCGCAAGCCCC  
AGGAATTCACCGTCACCTCCAGTGGGGACTTCTTCAAATACCACTTCACC  
AGTGCTGTGAGGCCTGACATTCCTGCCATGGTTCTTGAGAATGGCTGCCA  
GGAGGGTGTGTTGCTTTCGGTCTCTCGTCAAGAGGGCTCCGGAGAGATGC  
TCGCCCTGGCGGTGAGGATGGGTTCTCAGGCCGCCATCAAGATCGGCAAC  
GCAGTGGTGCACGGCCAGACTGGGATGCTTCTCACAGGCTCCAATGCCAA  
AGCCCAGGACCTCGGAACCATCCCCGGCGATTGCGGCTGCCCTATGTCT  
ACAAAAGGGCAACACCTGGGTTGTGATTGGTGTGCACGTGGCGGCCACC  
AGGTCGGGGAACACGGTGATCGCTGCTACCCATGGGGAACCCACCCCTGA  
GGCGCTGGAGTTCCAAGGACCCCCATGCTCCCTCGTCCCTCTGGCACCT  
ATGTAGGCCTCCCCATTGCAGACTATGGTGTGATGCCCCCTCCCTCAGCACC  
AAGACCATGTTCTGGCGCACTTCTCCAGAGAAGCTGCCGCCCTGGGGCATG  
GGAGCCCCTTACCTGGGTTCCAAGGATGAGAGGGTGGACGGTCCCTCCC  
TCCAGCAGGTTATGCGAGACCAGCTCAAGCCCTACTCCGAGCCTCGTGGA  
CTACTCCCCCGCAGGAGATTTTGGATGCAGTTTGTGATGCCATCGAGAA  
CCGACTTGAGAATACGCTGGAGCCCCAGAAGCCCTGGACCTTTAAGAAAG  
CCTGCGAGAGCCTTGATAAAGAACAACACTAGCAGTGGCTATCCCTACCACAA  
CAGAAGAGTAGGGACTGGACGGGCRCCGCTTCATTGGTGAGCTCGGTGA  
TCAAGCCACCCATGCCAACAAC
